# Supplementary material
Source: ML conference proceedings conference paper supplement (https://openreview.net/forum?id=smxQvTmdGS)
Supplement: supplementary_material [file attachment]

## Sheet: Sheet1
Table 1.2 Employment by detailed occupation, 2020 and projected 2030 (Numbers in thousands)
2020 National Employment Matrix title	2020 National Employment Matrix code	Occupation type	Employment, 2020	Employment, 2030	Employment distribution, percent, 2020	Employment distribution, percent, 2030	Employment change, 2020-30	Percent employment change, 2020-30	Occupational openings, 2020-30 annual average
Total, all occupations	00-0000	Summary	153534	165414	100	100	11879.9	7.7	18474.4
Management occupations	11-0000	Summary	9782.3	10689.1	6.4	6.5	906.8	9.3	904.4
Top executives	11-1000	Summary	2756.6	2970	1.8	1.8	213.5	7.7	251.4
Chief executives	11-1011	Line item	292.5	275.7	0.2	0.2	-16.8	-5.7	17.5
General and operations managers	11-1021	Line item	2411.9	2638.2	1.6	1.6	226.3	9.4	229.6
Legislators	11-1031	Line item	52.2	56.1	0	0	4	7.6	4.3
Advertising, marketing, promotions, public relations, and sales managers	2000-11-01	Summary	803.8	874.7	0.5	0.5	71	8.8	77
Advertising and promotions managers	2011-11-01	Line item	23.2	25.6	0	0	2.4	10.3	2.5
Marketing and sales managers	2020-11-01	Summary	691.6	748.9	0.5	0.5	57.3	8.3	65.5
Marketing managers	2021-11-01	Line item	293.7	323.1	0.2	0.2	29.4	10	28.5
Sales managers	2022-11-01	Line item	397.9	425.8	0.3	0.3	27.9	7	37
Public relations and fundraising managers	2030-11-01	Line item	89	100.3	0.1	0.1	11.3	12.6	8.9
Operations specialties managers	3000-11-01	Summary	2109.4	2354.8	1.4	1.4	245.4	11.6	188.4
Administrative services and facilities managers	3010-11-01	Line item	322	350.5	0.2	0.2	28.6	8.9	29.2
Computer and information systems managers	3021-11-01	Line item	482	534.6	0.3	0.3	52.7	10.9	42.4
Financial managers	3031-11-01	Line item	681.7	799.9	0.4	0.5	118.2	17.3	64.2
Industrial production managers	3051-11-01	Line item	189.3	199.3	0.1	0.1	10	5.3	13.9
Purchasing managers	3061-11-01	Line item	74.4	79	0	0	4.6	6.1	6.3
Transportation, storage, and distribution managers	3071-11-01	Line item	137.6	149	0.1	0.1	11.4	8.3	11.8
Compensation and benefits managers	3111-11-01	Line item	18.7	19.4	0	0	0.7	4	1.5
Human resources managers	3121-11-01	Line item	161.7	176.5	0.1	0.1	14.8	9.2	14.8
Training and development managers	3131-11-01	Line item	42.1	46.6	0	0	4.5	10.7	4.3
Other management occupations	9000-11-01	Summary	4112.5	4489.5	2.7	2.7	377	9.2	387.5
Farmers, ranchers, and other agricultural managers	9013-11-01	Line item	888.3	882.6	0.6	0.5	-5.8	-0.7	84.8
Construction managers	9021-11-01	Line item	448	499.4	0.3	0.3	51.4	11.5	38.9
Education and childcare administrators	9030-11-01	Summary	560.3	608.2	0.4	0.4	47.9	8.5	46.4
Education and childcare administrators, preschool and daycare	9031-11-01	Line item	60.8	67.7	0	0	6.9	11.4	5.3
Education administrators, kindergarten through secondary	9032-11-01	Line item	270.2	291.3	0.2	0.2	21.2	7.8	22.1
Education administrators, postsecondary	9033-11-01	Line item	178.8	192.2	0.1	0.1	13.4	7.5	14.5
Education administrators, all other	9039-11-01	Line item	50.5	56.9	0	0	6.4	12.6	4.5
Architectural and engineering managers	9041-11-01	Line item	197.8	205.9	0.1	0.1	8.1	4.1	14.7
Food service managers	9051-11-01	Line item	309.8	355.9	0.2	0.2	46.2	14.9	41.4
Gambling managers	9071-11-01	Line item	3.9	4.7	0	0	0.8	20.1	0.4
Lodging managers	9081-11-01	Line item	48.1	52.2	0	0	4.2	8.7	5.8
Medical and health services managers	9111-11-01	Line item	429.8	569.4	0.3	0.3	139.6	32.5	51.8
Natural sciences managers	9121-11-01	Line item	79	83.5	0.1	0.1	4.5	5.8	6
Postmasters and mail superintendents	9131-11-01	Line item	13.2	12.2	0	0	-1	-7.7	0.8
Property, real estate, and community association managers	9141-11-01	Line item	364.1	375.5	0.2	0.2	11.4	3.1	29.1
Social and community service managers	9151-11-01	Line item	174.2	200.7	0.1	0.1	26.4	15.2	18.3
Emergency management directors	9161-11-01	Line item	10.5	11.1	0	0	0.7	6.2	1
Funeral home managers	9171-11-01	Line item	12.5	12.9	0	0	0.4	3.2	1
Personal service managers, all other; entertainment and recreation managers, except gambling; and managers, all other	9198-11-01	Line item	573	615.3	0.4	0.4	42.2	7.4	47.1
Business and financial operations occupations	13-0000	Summary	9422.5	10173.3	6.1	6.2	750.8	8	901.7
Business operations specialists	13-1000	Summary	6368.4	6960.4	4.1	4.2	592.1	9.3	630.4
Agents and business managers of artists, performers, and athletes	13-1011	Line item	18.7	27.3	0	0	8.6	46.3	3.4
Buyers and purchasing agents	13-1020	Line item	439	415.4	0.3	0.3	-23.6	-5.4	39.5
Claims adjusters, appraisers, examiners, and investigators	13-1030	Summary	349.4	340.5	0.2	0.2	-9	-2.6	25.2
Claims adjusters, examiners, and investigators	13-1031	Line item	333.8	324.7	0.2	0.2	-9.1	-2.7	24
Insurance appraisers, auto damage	13-1032	Line item	15.6	15.7	0	0	0.1	0.6	1.2
Compliance officers	13-1041	Line item	348.7	370.3	0.2	0.2	21.6	6.2	30
Cost estimators	13-1051	Line item	199.4	200.6	0.1	0.1	1.2	0.6	17.8
Human resources workers	13-1070	Summary	748.6	815.6	0.5	0.5	67.1	9	79.9
Human resources specialists	13-1071	Line item	674.8	745.1	0.4	0.5	70.2	10.4	73.4
Farm labor contractors	13-1074	Line item	0.2	0.3	0	0	0	10.6	0
Labor relations specialists	13-1075	Line item	73.5	70.3	0	0	-3.2	-4.3	6.4
Logisticians	13-1081	Line item	191	247.3	0.1	0.1	56.4	29.5	24.5
Management analysts	13-1111	Line item	907.6	1032	0.6	0.6	124.4	13.7	99.4
Meeting, convention, and event planners	13-1121	Line item	125.9	148	0.1	0.1	22.1	17.5	16.4
Fundraisers	13-1131	Line item	101.3	117.5	0.1	0.1	16.1	15.9	12
Compensation, benefits, and job analysis specialists	13-1141	Line item	91.9	100.7	0.1	0.1	8.8	9.6	9.4
Training and development specialists	13-1151	Line item	328.7	364.2	0.2	0.2	35.5	10.8	35.2
Market research analysts and marketing specialists	13-1161	Line item	740.9	904.5	0.5	0.5	163.6	22.1	96
Project management specialists and business operations specialists, all other	13-1198	Line item	1777.3	1876.5	1.2	1.1	99.2	5.6	141.9
Financial specialists	13-2000	Summary	3054.1	3212.8	2	1.9	158.7	5.2	271.3
Accountants and auditors	13-2011	Line item	1392.2	1488.2	0.9	0.9	96	6.9	135
Property appraisers and assessors	13-2020	Line item	78.7	82.1	0.1	0	3.4	4.4	6.3
Budget analysts	13-2031	Line item	52.5	55	0	0	2.5	4.8	4.3
Credit analysts	13-2041	Line item	73	68.8	0	0	-4.3	-5.8	5.5
Personal financial advisors	13-2052	Line item	275.2	287.8	0.2	0.2	12.6	4.6	21.5
Insurance underwriters	13-2053	Line item	119.4	117.2	0.1	0.1	-2.2	-1.8	8.3
Financial examiners	13-2061	Line item	70.8	83.5	0	0.1	12.7	17.9	6.9
Credit counselors and loan officers	13-2070	Summary	355.9	363.2	0.2	0.2	7.3	2.1	28
Credit counselors	13-2071	Line item	33.8	36.9	0	0	3	9	3
Loan officers	13-2072	Line item	322.1	326.4	0.2	0.2	4.3	1.3	25
Tax examiners, collectors and preparers, and revenue agents	13-2080	Summary	144.3	143.6	0.1	0.1	-0.7	-0.5	14.3
Tax examiners and collectors, and revenue agents	13-2081	Line item	56.9	54.8	0	0	-2.1	-3.7	4.4
Tax preparers	13-2082	Line item	87.4	88.8	0.1	0.1	1.4	1.6	9.8
Financial and investment analysts, financial risk specialists, and financial specialists, all other	13-2098	Line item	492.1	523.4	0.3	0.3	31.3	6.4	41
Computer and mathematical occupations	15-0000	Summary	5225	5959.9	3.4	3.6	734.9	14.1	466.4
Computer occupations	15-1200	Summary	4985.3	5652.9	3.2	3.4	667.6	13.4	441.5
Computer and information analysts	15-1210	Summary	749.1	838.9	0.5	0.5	89.8	12	63.9
Computer systems analysts	15-1211	Line item	607.8	650.6	0.4	0.4	42.8	7	47.5
Information security analysts	15-1212	Line item	141.2	188.3	0.1	0.1	47.1	33.3	16.3
Computer and information research scientists	15-1221	Line item	33	40.2	0	0	7.2	21.9	3.2
Computer support specialists	15-1230	Summary	844.6	916.8	0.6	0.6	72.2	8.6	70.4
Computer network support specialists	15-1231	Line item	189.8	204	0.1	0.1	14.2	7.5	15.5
Computer user support specialists	15-1232	Line item	654.8	712.8	0.4	0.4	58	8.9	54.8
Database and network administrators and architects	15-1240	Summary	683.4	724.4	0.4	0.4	41	6	49.8
Computer network architects	15-1241	Line item	165.2	174.2	0.1	0.1	9	5.5	11
Network and computer systems administrators	15-1244	Line item	350.3	369.1	0.2	0.2	18.8	5.4	24.9
Database administrators and architects	15-1245	Line item	168	181.2	0.1	0.1	13.2	7.8	13.9
Software and web developers, programmers, and testers	15-1250	Summary	2233	2649.6	1.5	1.6	416.6	18.7	216.8
Computer programmers	15-1251	Line item	185.7	167.3	0.1	0.1	-18.3	-9.9	9.7
Software developers and software quality assurance analysts and testers	15-1256	Line item	1847.9	2257.4	1.2	1.4	409.5	22.2	189.2
Web developers and digital interface designers	15-1257	Line item	199.4	224.9	0.1	0.1	25.5	12.8	17.9
Computer occupations, all other	15-1299	Line item	442.2	483	0.3	0.3	40.7	9.2	37.5
Mathematical science occupations	15-2000	Summary	239.8	307	0.2	0.2	67.2	28	24.8
Actuaries	15-2011	Line item	27.7	34.5	0	0	6.8	24.5	2.4
Mathematicians	15-2021	Line item	2.7	2.8	0	0	0.1	2.7	0.2
Operations research analysts	15-2031	Line item	104.1	129.7	0.1	0.1	25.6	24.6	10.2
Statisticians	15-2041	Line item	42	56.9	0	0	14.9	35.4	5
Data scientists and mathematical science occupations, all other	15-2098	Line item	63.2	83	0	0.1	19.8	31.4	7.1
Architecture and engineering occupations	17-0000	Summary	2603	2748.9	1.7	1.7	146	5.6	207.4
Architects, surveyors, and cartographers	17-1000	Summary	209.6	214.9	0.1	0.1	5.3	2.6	16.2
Architects, except naval	17-1010	Summary	150.4	154.3	0.1	0.1	3.9	2.6	11
Architects, except landscape and naval	17-1011	Line item	126.7	130.7	0.1	0.1	3.9	3.1	9.4
Landscape architects	17-1012	Line item	23.7	23.6	0	0	-0.1	-0.3	1.6
Surveyors, cartographers, and photogrammetrists	17-1020	Summary	59.2	60.6	0	0	1.5	2.5	5.2
Cartographers and photogrammetrists	17-1021	Line item	13.2	13.9	0	0	0.7	5.4	1.2
Surveyors	17-1022	Line item	46	46.7	0	0	0.7	1.6	4
Engineers	17-2000	Summary	1719.4	1847	1.1	1.1	127.7	7.4	125.4
Aerospace engineers	17-2011	Line item	61.4	66.5	0	0	5.1	8.3	4
Agricultural engineers	17-2021	Line item	1.5	1.5	0	0	0.1	4.5	0.1
Bioengineers and biomedical engineers	17-2031	Line item	19.3	20.5	0	0	1.1	5.9	1.4
Chemical engineers	17-2041	Line item	26.3	28.7	0	0	2.4	9.3	1.8
Civil engineers	17-2051	Line item	309.8	335.1	0.2	0.2	25.3	8.2	25
Computer hardware engineers	17-2061	Line item	66.2	67.3	0	0	1	1.5	4.5
Electrical and electronics engineers	17-2070	Summary	313.2	333.6	0.2	0.2	20.4	6.5	22.7
Electrical engineers	17-2071	Line item	188	200.7	0.1	0.1	12.7	6.8	13.7
Electronics engineers, except computer	17-2072	Line item	125.2	132.9	0.1	0.1	7.7	6.2	9
Environmental engineers	17-2081	Line item	52.3	54.3	0	0	1.9	3.7	4
Industrial engineers, including health and safety	17-2110	Summary	316.1	357.6	0.2	0.2	41.4	13.1	25
Health and safety engineers, except mining safety engineers and inspectors	17-2111	Line item	24.1	25.6	0	0	1.5	6.1	1.7
Industrial engineers	17-2112	Line item	292	332	0.2	0.2	40	13.7	23.3
Marine engineers and naval architects	17-2121	Line item	9.8	10.2	0	0	0.4	3.9	0.5
Materials engineers	17-2131	Line item	25.1	27.2	0	0	2.1	8.4	1.8
Mechanical engineers	17-2141	Line item	299.2	320.1	0.2	0.2	20.9	7	20.2
Mining and geological engineers, including mining safety engineers	17-2151	Line item	6.3	6.6	0	0	0.2	3.9	0.4
Nuclear engineers	17-2161	Line item	17.2	15.8	0	0	-1.5	-8.4	0.9
Petroleum engineers	17-2171	Line item	28.5	30.7	0	0	2.2	7.6	2.1
Engineers, all other	17-2199	Line item	167.1	171.6	0.1	0.1	4.4	2.7	11
Drafters, engineering technicians, and mapping technicians	17-3000	Summary	674	687	0.4	0.4	13	1.9	65.8
Drafters	17-3010	Summary	191.8	188.2	0.1	0.1	-3.6	-1.9	17.5
Architectural and civil drafters	17-3011	Line item	99.9	99	0.1	0.1	-0.9	-0.9	9.3
Electrical and electronics drafters	17-3012	Line item	24	24.5	0	0	0.6	2.3	2.3
Mechanical drafters	17-3013	Line item	53.6	51	0	0	-2.5	-4.7	4.7
Drafters, all other	17-3019	Line item	14.4	13.6	0	0	-0.8	-5.4	1.2
Engineering technologists and technicians, except drafters	17-3020	Summary	332.7	343.1	0.2	0.2	10.4	3.1	32
Aerospace engineering and operations technologists and technicians	17-3021	Line item	11.9	12.9	0	0	1.1	8.9	1.2
Civil engineering technologists and technicians	17-3022	Line item	68.8	70	0	0	1.2	1.8	6.5
Electrical and electronic engineering technologists and technicians	17-3023	Line item	117	118.9	0.1	0.1	1.9	1.6	11
Electro-mechanical and mechatronics technologists and technicians	17-3024	Line item	13.4	13.1	0	0	-0.2	-1.7	1.2
Environmental engineering technologists and technicians	17-3025	Line item	17.3	18.6	0	0	1.3	7.8	1.8
Industrial engineering technologists and technicians	17-3026	Line item	64.1	66.9	0	0	2.8	4.4	6.3
Mechanical engineering technologists and technicians	17-3027	Line item	40.4	42.7	0	0	2.3	5.7	4
Surveying and mapping technicians	17-3031	Line item	54.8	56.9	0	0	2	3.7	7
Calibration technologists and technicians and engineering technologists and technicians, except drafters, all other	17-3098	Line item	94.7	98.8	0.1	0.1	4.1	4.4	9.3
Life, physical, and social science occupations	19-0000	Summary	1444	1557.8	0.9	0.9	113.8	7.9	147.5
Life scientists	19-1000	Summary	346.1	383.1	0.2	0.2	37	10.7	33.6
Agricultural and food scientists	19-1010	Summary	37.4	40.6	0	0	3.2	8.7	4.4
Animal scientists	19-1011	Line item	3.5	3.9	0	0	0.3	9.7	0.4
Food scientists and technologists	19-1012	Line item	15	16.1	0	0	1	6.7	1.7
Soil and plant scientists	19-1013	Line item	18.8	20.7	0	0	1.9	10	2.3
Biological scientists	19-1020	Summary	121	126.3	0.1	0.1	5.3	4.4	11.2
Biochemists and biophysicists	19-1021	Line item	34.8	36.5	0	0	1.6	4.7	3.2
Microbiologists	19-1022	Line item	21.4	22.4	0	0	1	4.6	2
Zoologists and wildlife biologists	19-1023	Line item	18.5	19.5	0	0	1	5.2	1.7
Biological scientists, all other	19-1029	Line item	46.2	47.9	0	0	1.7	3.7	4.2
Conservation scientists and foresters	19-1030	Summary	39	41.9	0	0	2.9	7.5	4
Conservation scientists	19-1031	Line item	25.3	26.8	0	0	1.5	6.1	2.5
Foresters	19-1032	Line item	13.7	15.1	0	0	1.4	10	1.4
Medical scientists	19-1040	Summary	141.8	166.7	0.1	0.1	24.9	17.6	13.4
Epidemiologists	19-1041	Line item	7.8	10.2	0	0	2.3	29.6	0.9
Medical scientists, except epidemiologists	19-1042	Line item	133.9	156.6	0.1	0.1	22.6	16.9	12.6
Life scientists, all other	19-1099	Line item	7	7.6	0	0	0.6	8.4	0.6
Physical scientists	19-2000	Summary	269.1	287.6	0.2	0.2	18.5	6.9	26.6
Astronomers and physicists	19-2010	Summary	19.5	21.1	0	0	1.6	8.3	1.5
Astronomers	19-2011	Line item	2.1	2.2	0	0	0.1	4.5	0.2
Physicists	19-2012	Line item	17.4	18.9	0	0	1.5	8.8	1.3
Atmospheric and space scientists	19-2021	Line item	10.7	11.6	0	0	0.9	8.3	1
Chemists and materials scientists	19-2030	Summary	92.4	98.4	0.1	0.1	6	6.5	9.1
Chemists	19-2031	Line item	85.4	91.1	0.1	0.1	5.7	6.7	8.4
Materials scientists	19-2032	Line item	7.1	7.3	0	0	0.3	3.9	0.7
Environmental scientists and geoscientists	19-2040	Summary	122.6	132.3	0.1	0.1	9.7	7.9	13.2
Environmental scientists and specialists, including health	19-2041	Line item	87.1	94.4	0.1	0.1	7.3	8.4	9.4
Geoscientists, except hydrologists and geographers	19-2042	Line item	29	31	0	0	2	7	3.1
Hydrologists	19-2043	Line item	6.5	6.9	0	0	0.4	5.6	0.7
Physical scientists, all other	19-2099	Line item	23.9	24.2	0	0	0.2	1	1.8
Social scientists and related workers	19-3000	Summary	312.3	334.2	0.2	0.2	21.9	7	25.8
Economists	19-3011	Line item	18.6	21	0	0	2.4	13.1	1.6
Survey researchers	19-3022	Line item	12.7	13.2	0	0	0.5	4.3	1.2
Psychologists	19-3030	Summary	178.9	192.4	0.1	0.1	13.5	7.6	13.4
Clinical, counseling, and school psychologists	19-3031	Line item	118.8	131.1	0.1	0.1	12.3	10.4	9.4
Industrial-organizational psychologists	19-3032	Line item	4.9	5	0	0	0.1	2.2	0.3
Psychologists, all other	19-3039	Line item	55.2	56.3	0	0	1.1	2	3.7
Sociologists	19-3041	Line item	3	3.1	0	0	0.1	4.8	0.3
Urban and regional planners	19-3051	Line item	39.1	41.8	0	0	2.7	6.8	3.7
Miscellaneous social scientists and related workers	19-3090	Summary	60.2	62.7	0	0	2.6	4.3	5.6
Anthropologists and archeologists	19-3091	Line item	8.5	9.1	0	0	0.6	7.4	0.8
Geographers	19-3092	Line item	1.6	1.7	0	0	0	1.1	0.1
Historians	19-3093	Line item	3.1	3.3	0	0	0.2	5.5	0.3
Political scientists	19-3094	Line item	7	7.6	0	0	0.6	8.6	0.7
Social scientists and related workers, all other	19-3099	Line item	39.9	41.1	0	0	1.2	2.9	3.7
Life, physical, and social science technicians	19-4000	Summary	397.2	424.8	0.3	0.3	27.6	7	51.9
Agricultural and food science technicians	19-4010	Line item	26.6	28.7	0	0	2.1	7.9	3.7
Biological technicians	19-4021	Line item	87.6	93.5	0.1	0.1	5.9	6.7	11.8
Chemical technicians	19-4031	Line item	65.1	68.4	0	0	3.3	5	7.5
Environmental science and geoscience technicians	19-4040	Summary	51	56.1	0	0	5.1	9.9	7
Environmental science and protection technicians, including health	19-4042	Line item	34.2	37.8	0	0	3.6	10.6	4.7
Geological and hydrologic technicians	19-4045	Line item	16.8	18.3	0	0	1.5	8.7	2.3
Nuclear technicians	19-4051	Line item	6.6	5.8	0	0	-0.8	-12.4	0.7
Social science research assistants	19-4061	Line item	40.4	43.8	0	0	3.4	8.4	5.4
Forest and conservation technicians	19-4071	Line item	33	33.3	0	0	0.2	0.7	4
Miscellaneous life, physical, and social science technicians	19-4090	Summary	86.9	95.3	0.1	0.1	8.5	9.7	11.8
Forensic science technicians	19-4092	Line item	17.2	19.8	0	0	2.7	15.6	2.5
Life, physical, and social science technicians, all other	19-4099	Line item	69.7	75.5	0	0	5.8	8.3	9.3
Occupational health and safety specialists and technicians	19-5000	Summary	119.2	128	0.1	0.1	8.8	7.4	9.6
Occupational health and safety specialists	19-5011	Line item	98	104.8	0.1	0.1	6.8	7	7.8
Occupational health and safety technicians	19-5012	Line item	21.3	23.2	0	0	1.9	9	1.8
Community and social service occupations	21-0000	Summary	2804.4	3151.3	1.8	1.9	346.9	12.4	327.5
Counselors, social workers, and other community and social service specialists	21-1000	Summary	2328	2663.7	1.5	1.6	335.7	14.4	274.6
Counselors	21-1010	Summary	881.5	1021.2	0.6	0.6	139.7	15.8	101.3
Educational, guidance, and career counselors and advisors	21-1012	Line item	322	359	0.2	0.2	37	11.5	35
Marriage and family therapists	21-1013	Line item	73.2	85.1	0	0.1	12	16.4	8.5
Rehabilitation counselors	21-1015	Line item	104.5	115.4	0.1	0.1	10.8	10.4	11.2
Substance abuse, behavioral disorder, and mental health counselors	21-1018	Line item	327.5	402.6	0.2	0.2	75.1	22.9	41
Counselors, all other	21-1019	Line item	54.3	59.2	0	0	4.8	8.9	5.7
Social workers	21-1020	Summary	715.6	804.8	0.5	0.5	89.2	12.5	78.3
Child, family, and school social workers	21-1021	Line item	335.3	377.4	0.2	0.2	42.2	12.6	36.7
Healthcare social workers	21-1022	Line item	184.9	209.3	0.1	0.1	24.4	13.2	20.4
Mental health and substance abuse social workers	21-1023	Line item	124	142.5	0.1	0.1	18.5	14.9	14
Social workers, all other	21-1029	Line item	71.4	75.5	0	0	4.1	5.8	7.1
Miscellaneous community and social service specialists	21-1090	Summary	730.9	837.7	0.5	0.5	106.7	14.6	95
Health education specialists	21-1091	Line item	61.1	68.7	0	0	7.6	12.4	7.4
Probation officers and correctional treatment specialists	21-1092	Line item	92.7	96.2	0.1	0.1	3.5	3.8	8.1
Social and human service assistants	21-1093	Line item	417.6	487.1	0.3	0.3	69.5	16.6	59.1
Community health workers	21-1094	Line item	64.1	77.6	0	0	13.5	21	8.6
Community and social service specialists, all other	21-1099	Line item	95.5	108.2	0.1	0.1	12.7	13.3	11.7
Religious workers	21-2000	Summary	476.4	487.6	0.3	0.3	11.2	2.3	52.9
Clergy	21-2011	Line item	260.6	267.2	0.2	0.2	6.6	2.5	26.7
Directors, religious activities and education	21-2021	Line item	149.6	152.8	0.1	0.1	3.2	2.2	17.4
Religious workers, all other	21-2099	Line item	66.3	67.6	0	0	1.3	2	8.8
Legal occupations	23-0000	Summary	1328.7	1445.2	0.9	0.9	116.6	8.8	103.6
Lawyers, judges, and related workers	23-1000	Summary	871.2	945	0.6	0.6	73.9	8.5	49.7
Lawyers and judicial law clerks	23-1010	Summary	819.3	891.4	0.5	0.5	72	8.8	47.1
Lawyers	23-1011	Line item	804.2	875.7	0.5	0.5	71.5	8.9	46
Judicial law clerks	23-1012	Line item	15.1	15.7	0	0	0.6	3.9	1.1
Judges, magistrates, and other judicial workers	23-1020	Summary	51.9	53.7	0	0	1.8	3.5	2.6
Administrative law judges, adjudicators, and hearing officers	23-1021	Line item	15.5	15.6	0	0	0.1	0.8	0.7
Arbitrators, mediators, and conciliators	23-1022	Line item	6.9	7.6	0	0	0.7	9.7	0.4
Judges, magistrate judges, and magistrates	23-1023	Line item	29.4	30.4	0	0	1	3.4	1.5
Legal support workers	23-2000	Summary	457.5	500.2	0.3	0.3	42.7	9.3	53.9
Paralegals and legal assistants	23-2011	Line item	345.6	387	0.2	0.2	41.4	12	43
Miscellaneous legal support workers	23-2090	Summary	111.8	113.2	0.1	0.1	1.3	1.2	10.8
Title examiners, abstractors, and searchers	23-2093	Line item	62.2	63.3	0	0	1.1	1.7	6.1
Legal support workers, all other	23-2099	Line item	49.6	49.8	0	0	0.2	0.5	4.7
Educational instruction and library occupations	25-0000	Summary	9134.7	10055.2	5.9	6.1	920.5	10.1	932.9
Postsecondary teachers	25-1000	Summary	1621.4	1795.5	1.1	1.1	174.1	10.7	173.7
Business teachers, postsecondary	25-1011	Line item	96.5	102.8	0.1	0.1	6.2	6.5	9.7
Math and computer science teachers, postsecondary	25-1020	Summary	93.9	99.6	0.1	0.1	5.8	6.2	9.4
Computer science teachers, postsecondary	25-1021	Line item	37.8	40.4	0	0	2.6	6.9	3.8
Mathematical science teachers, postsecondary	25-1022	Line item	56.1	59.2	0	0	3.2	5.6	5.6
Engineering and architecture teachers, postsecondary	25-1030	Summary	54.8	61.3	0	0	6.5	11.9	6
Architecture teachers, postsecondary	25-1031	Line item	8.5	9.2	0	0	0.7	8.3	0.9
Engineering teachers, postsecondary	25-1032	Line item	46.3	52.1	0	0	5.8	12.5	5.1
Life sciences teachers, postsecondary	25-1040	Summary	72.1	80.4	0	0	8.3	11.5	7.8
Agricultural sciences teachers, postsecondary	25-1041	Line item	9.9	10.4	0	0	0.5	5	1
Biological science teachers, postsecondary	25-1042	Line item	60.5	68.2	0	0	7.7	12.8	6.7
Forestry and conservation science teachers, postsecondary	25-1043	Line item	1.7	1.8	0	0	0.1	5.5	0.2
Physical sciences teachers, postsecondary	25-1050	Summary	62.8	67.5	0	0	4.7	7.5	6.4
Atmospheric, earth, marine, and space sciences teachers, postsecondary	25-1051	Line item	13.6	14.5	0	0	0.9	6.4	1.4
Chemistry teachers, postsecondary	25-1052	Line item	25.6	27.6	0	0	2	7.9	2.6
Environmental science teachers, postsecondary	25-1053	Line item	7.1	7.6	0	0	0.5	6.8	0.7
Physics teachers, postsecondary	25-1054	Line item	16.5	17.8	0	0	1.3	8.1	1.7
Social sciences teachers, postsecondary	25-1060	Summary	136.9	148.4	0.1	0.1	11.5	8.4	14.2
Anthropology and archeology teachers, postsecondary	25-1061	Line item	6.7	7.2	0	0	0.5	8.1	0.7
Area, ethnic, and cultural studies teachers, postsecondary	25-1062	Line item	12.1	13.1	0	0	1.1	8.8	1.3
Economics teachers, postsecondary	25-1063	Line item	16	17.4	0	0	1.4	9	1.7
Geography teachers, postsecondary	25-1064	Line item	4.4	4.7	0	0	0.3	6.3	0.4
Political science teachers, postsecondary	25-1065	Line item	18.4	20	0	0	1.6	8.7	1.9
Psychology teachers, postsecondary	25-1066	Line item	44.1	48.6	0	0	4.5	10.3	4.7
Sociology teachers, postsecondary	25-1067	Line item	15.9	17.1	0	0	1.2	7.6	1.6
Social sciences teachers, postsecondary, all other	25-1069	Line item	19.5	20.3	0	0	0.8	4.3	1.9
Health teachers, postsecondary	25-1070	Summary	315.3	390.5	0.2	0.2	75.2	23.8	39.8
Health specialties teachers, postsecondary	25-1071	Line item	242.7	301.6	0.2	0.2	58.9	24.3	30.8
Nursing instructors and teachers, postsecondary	25-1072	Line item	72.6	88.9	0	0.1	16.3	22.4	9
Education and library science teachers, postsecondary	25-1080	Summary	75	81	0	0	6.1	8.1	7.7
Education teachers, postsecondary	25-1081	Line item	70	75.8	0	0	5.8	8.3	7.2
Library science teachers, postsecondary	25-1082	Line item	5	5.3	0	0	0.3	5.9	0.5
Law, criminal justice, and social work teachers, postsecondary	25-1110	Summary	51.6	56.9	0	0	5.3	10.2	5.5
Criminal justice and law enforcement teachers, postsecondary	25-1111	Line item	16.1	17.9	0	0	1.8	11.1	1.7
Law teachers, postsecondary	25-1112	Line item	18.9	21	0	0	2	10.6	2
Social work teachers, postsecondary	25-1113	Line item	16.6	18.1	0	0	1.5	8.9	1.7
Arts, communications, history, and humanities teachers, postsecondary	25-1120	Summary	298.4	324.2	0.2	0.2	25.8	8.7	31.1
Art, drama, and music teachers, postsecondary	25-1121	Line item	109.3	120.3	0.1	0.1	11	10.1	11.6
Communications teachers, postsecondary	25-1122	Line item	33.6	36	0	0	2.4	7.3	3.4
English language and literature teachers, postsecondary	25-1123	Line item	75	79.6	0	0	4.7	6.2	7.5
Foreign language and literature teachers, postsecondary	25-1124	Line item	27.1	29.7	0	0	2.6	9.4	2.9
History teachers, postsecondary	25-1125	Line item	24.4	26.3	0	0	1.9	7.9	2.5
Philosophy and religion teachers, postsecondary	25-1126	Line item	29	32.2	0	0	3.2	11	3.1
Miscellaneous postsecondary teachers	25-1190	Summary	364.1	382.9	0.2	0.2	18.7	5.1	36
Family and consumer sciences teachers, postsecondary	25-1192	Line item	2.6	2.8	0	0	0.2	5.8	0.3
Recreation and fitness studies teachers, postsecondary	25-1193	Line item	17	18.2	0	0	1.2	6.8	1.7
Career/technical education teachers, postsecondary	25-1194	Line item	114.2	118.1	0.1	0.1	3.8	3.4	11
Postsecondary teachers, all other	25-1199	Line item	230.3	243.9	0.1	0.1	13.6	5.9	23
Preschool, elementary, middle, secondary, and special education teachers	25-2000	Summary	4106.3	4470.9	2.7	2.7	364.5	8.9	354.8
Preschool and kindergarten teachers	25-2010	Summary	590.9	687	0.4	0.4	96.2	16.3	73.1
Preschool teachers, except special education	25-2011	Line item	469.6	556	0.3	0.3	86.4	18.4	59.6
Kindergarten teachers, except special education	25-2012	Line item	121.3	131.1	0.1	0.1	9.8	8.1	13.5
Elementary and middle school teachers	25-2020	Summary	1981.1	2128.5	1.3	1.3	147.4	7.4	160.1
Elementary school teachers, except special education	25-2021	Line item	1371.1	1472.9	0.9	0.9	101.7	7.4	110.8
Middle school teachers, except special and career/technical education	25-2022	Line item	598.5	643.3	0.4	0.4	44.8	7.5	48.4
Career/technical education teachers, middle school	25-2023	Line item	11.5	12.4	0	0	0.9	7.4	0.9
Secondary school teachers	25-2030	Summary	1071.2	1154.5	0.7	0.7	83.4	7.8	83
Secondary school teachers, except special and career/technical education	25-2031	Line item	998.8	1077	0.7	0.7	78.2	7.8	77.4
Career/technical education teachers, secondary school	25-2032	Line item	72.3	77.5	0	0	5.1	7.1	5.5
Special education teachers	25-2050	Summary	463.2	500.8	0.3	0.3	37.6	8.1	38.6
Special education teachers, preschool	25-2051	Line item	20.8	23.4	0	0	2.5	12.1	1.8
Special education teachers, kindergarten and elementary school	25-2052	Line item	188.6	203.4	0.1	0.1	14.8	7.8	15.7
Special education teachers, middle school	25-2057	Line item	78.5	84.4	0.1	0.1	5.9	7.5	6.5
Special education teachers, secondary school	25-2058	Line item	140.9	151.8	0.1	0.1	10.8	7.7	11.7
Special education teachers, all other	25-2059	Line item	34.3	37.9	0	0	3.6	10.5	3
Other teachers and instructors	25-3000	Summary	1306.9	1511.6	0.9	0.9	204.7	15.7	180.1
Adult basic education, adult secondary education, and English as a Second Language instructors	25-3011	Line item	48.3	45.9	0	0	-2.4	-5	5.1
Self-enrichment teachers	25-3021	Line item	336.7	415.9	0.2	0.3	79.2	23.5	50.5
Substitute teachers, short-term	25-3031	Line item	536.9	604.6	0.3	0.4	67.8	12.6	71.4
Tutors and teachers and instructors, all other	25-3097	Line item	385	445.2	0.3	0.3	60.2	15.6	53
Librarians, curators, and archivists	25-4000	Summary	271.6	291.3	0.2	0.2	19.8	7.3	33.6
Archivists, curators, and museum technicians	25-4010	Summary	35	41.6	0	0	6.6	18.8	4.9
Archivists	25-4011	Line item	8.1	9	0	0	0.9	10.9	1
Curators	25-4012	Line item	13.4	16.3	0	0	2.9	21.6	1.9
Museum technicians and conservators	25-4013	Line item	13.5	16.3	0	0	2.8	20.6	1.9
Librarians and media collections specialists	25-4022	Line item	143.5	156.5	0.1	0.1	13	9.1	15.2
Library technicians	25-4031	Line item	93.1	93.2	0.1	0.1	0.1	0.2	13.4
Other educational instruction and library occupations	25-9000	Summary	1828.5	1985.9	1.2	1.2	157.4	8.6	190.7
Farm and home management educators	25-9021	Line item	9.3	9.2	0	0	-0.1	-1.2	0.8
Instructional coordinators	25-9031	Line item	190.4	208.9	0.1	0.1	18.4	9.7	20.4
Teaching assistants	25-9040	Summary	1471.7	1598.3	1	1	126.5	8.6	153
Teaching assistants, postsecondary	25-9044	Line item	165.4	176	0.1	0.1	10.5	6.4	16.7
Teaching assistants, except postsecondary	25-9045	Line item	1306.3	1422.3	0.9	0.9	116	8.9	136.4
Educational instruction and library workers, all other	25-9099	Line item	157	169.5	0.1	0.1	12.5	8	16.4
Arts, design, entertainment, sports, and media occupations	27-0000	Summary	2662.2	3011.4	1.7	1.8	349.2	13.1	319.5
Art and design workers	27-1000	Summary	849.6	886.7	0.6	0.5	37	4.4	84.2
Artists and related workers	27-1010	Summary	209.2	236.9	0.1	0.1	27.7	13.2	25.2
Art directors	27-1011	Line item	98.5	109.4	0.1	0.1	10.8	11	11.5
Craft artists	27-1012	Line item	9.6	10.9	0	0	1.3	13.2	1.2
Fine artists, including painters, sculptors, and illustrators	27-1013	Line item	25.9	30.4	0	0	4.5	17.3	3.3
Special effects artists and animators	27-1014	Line item	62.4	72.3	0	0	9.9	15.8	7.8
Artists and related workers, all other	27-1019	Line item	12.6	13.8	0	0	1.2	9.5	1.5
Designers	27-1020	Summary	640.4	649.8	0.4	0.4	9.4	1.5	59
Commercial and industrial designers	27-1021	Line item	31.5	33.3	0	0	1.8	5.6	3.1
Fashion designers	27-1022	Line item	27.8	28	0	0	0.1	0.5	2.5
Floral designers	27-1023	Line item	42.3	33.8	0	0	-8.5	-20.1	2.6
Graphic designers	27-1024	Line item	254.1	261.4	0.2	0.2	7.3	2.9	23.9
Interior designers	27-1025	Line item	87	86.9	0.1	0.1	-0.2	-0.2	7.8
Merchandise displayers and window trimmers	27-1026	Line item	136.4	142.4	0.1	0.1	6.1	4.4	13.2
Set and exhibit designers	27-1027	Line item	29.7	32.4	0	0	2.7	9.1	3.1
Designers, all other	27-1029	Line item	31.6	31.6	0	0	0	0.1	2.8
Entertainers and performers, sports and related workers	27-2000	Summary	722.1	882.8	0.5	0.5	160.6	22.2	110.7
Actors, producers, and directors	27-2010	Summary	182.6	230.9	0.1	0.1	48.3	26.5	23.8
Actors	27-2011	Line item	51.6	68.3	0	0	16.7	32.4	8.2
Producers and directors	27-2012	Line item	131	162.5	0.1	0.1	31.6	24.1	15.6
Athletes, coaches, umpires, and related workers	27-2020	Summary	286.8	363	0.2	0.2	76.2	26.6	52.2
Athletes and sports competitors	27-2021	Line item	16.7	23	0	0	6.3	38	3.4
Coaches and scouts	27-2022	Line item	249.9	313.8	0.2	0.2	63.9	25.6	45.1
Umpires, referees, and other sports officials	27-2023	Line item	20.2	26.2	0	0	6	29.4	3.8
Dancers and choreographers	27-2030	Summary	13.6	17.7	0	0	4.2	30.7	3
Dancers	27-2031	Line item	9	11.7	0	0	2.7	30	1.9
Choreographers	27-2032	Line item	4.6	6.1	0	0	1.5	32.1	1
Musicians, singers, and related workers	27-2040	Summary	205.5	226	0.1	0.1	20.5	10	26.8
Music directors and composers	27-2041	Line item	48.1	51.2	0	0	3	6.3	6
Musicians and singers	27-2042	Line item	157.3	174.8	0.1	0.1	17.5	11.1	20.8
Miscellaneous entertainers and performers, sports and related workers	27-2090	Line item	33.7	45.2	0	0	11.4	33.8	4.9
Media and communication workers	27-3000	Summary	777.9	863.6	0.5	0.5	85.7	11	85.3
Broadcast announcers and radio disc jockeys	27-3011	Line item	30.7	33.9	0	0	3.2	10.3	3.3
News analysts, reporters, and journalists	27-3023	Line item	46.7	49.5	0	0	2.8	6	5.4
Public relations specialists	27-3031	Line item	272.3	303.4	0.2	0.2	31.2	11.4	29.2
Writers and editors	27-3040	Summary	304	327.9	0.2	0.2	23.8	7.8	32.1
Editors	27-3041	Line item	108.6	114.1	0.1	0.1	5.6	5.1	11.2
Technical writers	27-3042	Line item	52.3	58.3	0	0	6.1	11.6	5.5
Writers and authors	27-3043	Line item	143.2	155.4	0.1	0.1	12.2	8.5	15.4
Miscellaneous media and communication workers	27-3090	Summary	124.2	148.9	0.1	0.1	24.8	19.9	15.3
Interpreters and translators	27-3091	Line item	81.4	100.7	0.1	0.1	19.3	23.7	10.4
Court reporters and simultaneous captioners	27-3092	Line item	21.3	21.8	0	0	0.5	2.5	2.1
Media and communication workers, all other	27-3099	Line item	21.5	26.4	0	0	4.9	22.9	2.7
Media and communication equipment workers	27-4000	Summary	312.5	378.3	0.2	0.2	65.8	21	39.3
Audio and video technicians	27-4011	Line item	73.9	93.3	0	0.1	19.4	26.2	10.2
Broadcast technicians	27-4012	Line item	28.4	31.6	0	0	3.2	11.2	3.3
Sound engineering technicians	27-4014	Line item	13.1	15.4	0	0	2.3	17.4	1.6
Photographers	27-4021	Line item	110.5	129.4	0.1	0.1	18.9	17.1	12.7
Television, video, and film camera operators and editors	27-4030	Summary	63.3	81.6	0	0	18.3	28.8	8.6
Camera operators, television, video, and film	27-4031	Line item	30.3	37.6	0	0	7.3	24.1	3.9
Film and video editors	27-4032	Line item	33	43.9	0	0	11	33.2	4.7
Lighting technicians and media and communication equipment workers, all other	27-4098	Line item	23.3	27.1	0	0	3.8	16.2	2.9
Healthcare practitioners and technical occupations	29-0000	Summary	9011.4	9985.9	5.9	6	974.6	10.8	621.1
Healthcare diagnosing or treating practitioners	29-1000	Summary	5960.5	6646.4	3.9	4	685.9	11.5	367.7
Chiropractors	29-1011	Line item	51.4	57	0	0	5.6	10.8	1.8
Dentists	29-1020	Summary	139.2	150.3	0.1	0.1	11.1	8	5
Dentists, general	29-1021	Line item	120.3	130	0.1	0.1	9.8	8.1	4.3
Oral and maxillofacial surgeons	29-1022	Line item	5.2	5.6	0	0	0.4	7.7	0.2
Orthodontists	29-1023	Line item	6.4	6.9	0	0	0.5	8.1	0.2
Prosthodontists	29-1024	Line item	0.7	0.7	0	0	0.1	8.5	0
Dentists, all other specialists	29-1029	Line item	6.8	7.1	0	0	0.3	5	0.2
Dietitians and nutritionists	29-1031	Line item	73	80.8	0	0	7.8	10.7	5.9
Optometrists	29-1041	Line item	43.3	47.2	0	0	3.9	9	1.7
Pharmacists	29-1051	Line item	322.2	315.3	0.2	0.2	-7	-2.2	11.3
Physician assistants	29-1071	Line item	129.4	169.5	0.1	0.1	40.1	31	12.2
Podiatrists	29-1081	Line item	12.1	12.3	0	0	0.2	1.8	0.9
Therapists	29-1120	Summary	748.7	907.6	0.5	0.5	158.9	21.2	57.8
Occupational therapists	29-1122	Line item	131.6	154.6	0.1	0.1	23	17.5	10.1
Physical therapists	29-1123	Line item	239.2	288.3	0.2	0.2	49.1	20.5	15.6
Radiation therapists	29-1124	Line item	17.7	19.3	0	0	1.6	9.1	1.1
Recreational therapists	29-1125	Line item	20.8	23	0	0	2.2	10.4	1.9
Respiratory therapists	29-1126	Line item	135.1	166.2	0.1	0.1	31.1	23	10.1
Speech-language pathologists	29-1127	Line item	158.1	203.5	0.1	0.1	45.4	28.7	15.2
Exercise physiologists	29-1128	Line item	18	20.4	0	0	2.4	13.1	1.5
Therapists, all other	29-1129	Line item	28.1	32.3	0	0	4.2	14.8	2.4
Veterinarians	29-1131	Line item	86.8	101.3	0.1	0.1	14.5	16.8	4.4
Registered nurses	29-1141	Line item	3080.1	3356.8	2	2	276.8	9	194.5
Nurse anesthetists	29-1151	Line item	44.2	49.8	0	0	5.6	12.6	2.9
Nurse midwives	29-1161	Line item	7.3	8.2	0	0	0.8	11.3	0.5
Nurse practitioners	29-1171	Line item	220.3	335.2	0.1	0.2	114.9	52.2	26
Audiologists	29-1181	Line item	13.7	15.8	0	0	2.1	15.7	0.8
Anesthesiologists	29-1211	Line item	31.3	31.2	0	0	-0.2	-0.5	0.8
Family medicine physicians	29-1215	Line item	107.7	113	0.1	0.1	5.3	4.9	3.5
General internal medicine physicians	29-1216	Line item	55.5	55.1	0	0	-0.4	-0.7	1.5
Obstetricians and gynecologists	29-1218	Line item	20.7	20.3	0	0	-0.4	-2.1	0.5
Pediatricians, general	29-1221	Line item	30.2	29.6	0	0	-0.5	-1.8	0.8
Psychiatrists	29-1223	Line item	28.1	31.6	0	0	3.5	12.5	1.2
Physicians, all other; and ophthalmologists, except pediatric	29-1228	Line item	412.1	430.8	0.3	0.3	18.7	4.5	13.4
Surgeons, except ophthalmologists	29-1248	Line item	41.5	40.3	0	0	-1.2	-2.8	1
Miscellaneous healthcare diagnosing or treating practitioners	29-1290	Summary	261.8	287.5	0.2	0.2	25.7	9.8	19.2
Dental hygienists	29-1292	Line item	206.1	229.2	0.1	0.1	23.1	11.2	15.6
Acupuncturists and healthcare diagnosing or treating practitioners, all other	29-1298	Line item	55.7	58.3	0	0	2.6	4.7	3.6
Health technologists and technicians	29-2000	Summary	2937	3209.5	1.9	1.9	272.5	9.3	243.2
Clinical laboratory technologists and technicians	29-2010	Line item	335.5	372	0.2	0.2	36.5	10.9	25.9
Cardiovascular technologists and technicians	29-2031	Line item	58.2	63	0	0	4.7	8.1	4.7
Diagnostic medical sonographers	29-2032	Line item	75.9	90.3	0	0.1	14.4	19	7.3
Nuclear medicine technologists	29-2033	Line item	18.3	19.7	0	0	1.4	7.8	1.5
Radiologic technologists and technicians	29-2034	Line item	212.1	230.3	0.1	0.1	18.3	8.6	17.4
Magnetic resonance imaging technologists	29-2035	Line item	42	45.3	0	0	3.4	8.1	3.4
Emergency medical technicians and paramedics	29-2040	Line item	261.3	289.9	0.2	0.2	28.6	11	20.7
Health practitioner support technologists and technicians	29-2050	Summary	822.7	888.4	0.5	0.5	65.7	8	66.7
Dietetic technicians	29-2051	Line item	26.8	28.8	0	0	2	7.4	2.2
Pharmacy technicians	29-2052	Line item	419.3	435.9	0.3	0.3	16.6	4	31.7
Psychiatric technicians	29-2053	Line item	91.6	103.3	0.1	0.1	11.7	12.8	8
Surgical technologists	29-2055	Line item	109.7	119.2	0.1	0.1	9.5	8.7	9
Veterinary technologists and technicians	29-2056	Line item	114.4	131.5	0.1	0.1	17.1	14.9	10.4
Ophthalmic medical technicians	29-2057	Line item	60.9	69.6	0	0	8.7	14.3	5.5
Licensed practical and licensed vocational nurses	29-2061	Line item	688.1	751.9	0.4	0.5	63.8	9.3	60.7
Opticians, dispensing	29-2081	Line item	69.8	74.2	0	0	4.3	6.2	5.9
Orthotists and prosthetists	29-2091	Line item	10.1	12	0	0	1.9	18.4	1
Hearing aid specialists	29-2092	Line item	8	8.9	0	0	0.9	11.3	0.7
Medical dosimetrists, medical records specialists, and health technologists and technicians, all other	29-2098	Line item	335	363.6	0.2	0.2	28.6	8.5	27.4
Other healthcare practitioners and technical occupations	29-9000	Summary	113.9	130.1	0.1	0.1	16.2	14.2	10.2
Athletic trainers	29-9091	Line item	30	37	0	0	7	23.4	3.1
Genetic counselors	29-9092	Line item	2.4	3.1	0	0	0.6	26.2	0.3
Health information technologists, medical registrars, surgical assistants, and healthcare practitioners and technical workers, all other	29-9098	Line item	81.4	89.9	0.1	0.1	8.6	10.5	6.9
Healthcare support occupations	31-0000	Summary	6837.8	8418	4.5	5.1	1580.1	23.1	1075.9
Home health and personal care aides; and nursing assistants, orderlies, and psychiatric aides	31-1100	Summary	4965.4	6217.8	3.2	3.8	1252.4	25.2	799.8
Home health and personal care aides	31-1120	Line item	3470.7	4600.6	2.3	2.8	1129.9	32.6	599.8
Nursing assistants, orderlies, and psychiatric aides	31-1130	Summary	1494.8	1617.2	1	1	122.5	8.2	200
Nursing assistants	31-1131	Line item	1396.7	1512	0.9	0.9	115.3	8.3	187
Orderlies	31-1132	Line item	44	47.2	0	0	3.2	7.2	5.8
Psychiatric aides	31-1133	Line item	54.1	58.1	0	0	4	7.4	7.2
Occupational therapy and physical therapist assistants and aides	31-2000	Summary	189.5	251.3	0.1	0.2	61.8	32.6	32.5
Occupational therapy assistants and aides	31-2010	Summary	49	65.9	0	0	16.8	34.3	8.8
Occupational therapy assistants	31-2011	Line item	43.3	58.9	0	0	15.6	36.1	7.8
Occupational therapy aides	31-2012	Line item	5.8	7	0	0	1.2	21.4	0.9
Physical therapist assistants and aides	31-2020	Summary	140.5	185.4	0.1	0.1	44.9	32	23.8
Physical therapist assistants	31-2021	Line item	93.8	126.9	0.1	0.1	33.2	35.4	16.4
Physical therapist aides	31-2022	Line item	46.7	58.5	0	0	11.8	25.3	7.4
Other healthcare support occupations	31-9000	Summary	1682.9	1948.9	1.1	1.2	266	15.8	243.5
Massage therapists	31-9011	Line item	144.6	191.1	0.1	0.1	46.5	32.2	23.3
Miscellaneous healthcare support occupations	31-9090	Summary	1538.3	1757.8	1	1.1	219.5	14.3	220.3
Dental assistants	31-9091	Line item	330.2	367	0.2	0.2	36.9	11.2	44
Medical assistants	31-9092	Line item	720.9	853.5	0.5	0.5	132.6	18.4	104.4
Medical equipment preparers	31-9093	Line item	58.7	63.6	0	0	4.9	8.4	7.9
Medical transcriptionists	31-9094	Line item	52.4	48.5	0	0	-3.9	-7.4	6.6
Pharmacy aides	31-9095	Line item	38.9	33.2	0	0	-5.7	-14.7	4.1
Veterinary assistants and laboratory animal caretakers	31-9096	Line item	107.2	122.5	0.1	0.1	15.3	14.3	19.8
Phlebotomists	31-9097	Line item	129.6	158.4	0.1	0.1	28.8	22.2	19.5
Healthcare support workers, all other	31-9099	Line item	100.5	111	0.1	0.1	10.6	10.5	13.9
Protective service occupations	33-0000	Summary	3417.2	3703.7	2.2	2.2	286.4	8.4	427.5
Supervisors of protective service workers	33-1000	Summary	332.8	353.9	0.2	0.2	21.1	6.3	27.5
First-line supervisors of law enforcement workers	33-1010	Summary	181.2	188.1	0.1	0.1	7	3.8	13.2
First-line supervisors of correctional officers	33-1011	Line item	55.3	53.8	0	0	-1.5	-2.8	4.1
First-line supervisors of police and detectives	33-1012	Line item	125.8	134.3	0.1	0.1	8.5	6.8	9.1
First-line supervisors of firefighting and prevention workers	33-1021	Line item	70.2	76	0	0	5.8	8.2	5.3
Miscellaneous first-line supervisors, protective service workers	33-1090	Line item	81.4	89.8	0.1	0.1	8.3	10.2	9
Firefighting and prevention workers	33-2000	Summary	334.9	363.8	0.2	0.2	28.9	8.6	29.1
Firefighters	33-2011	Line item	317.2	344.1	0.2	0.2	26.9	8.5	27
Fire inspectors	33-2020	Summary	17.7	19.7	0	0	2	11.5	2.1
Fire inspectors and investigators	33-2021	Line item	14.7	16	0	0	1.3	8.9	1.7
Forest fire inspectors and prevention specialists	33-2022	Line item	3	3.7	0	0	0.7	23.9	0.4
Law enforcement workers	33-3000	Summary	1239.9	1259	0.8	0.8	19.1	1.5	103.2
Bailiffs, correctional officers, and jailers	33-3010	Summary	437.1	407.2	0.3	0.2	-29.9	-6.8	35.7
Bailiffs	33-3011	Line item	18.5	18.6	0	0	0.1	0.4	1.7
Correctional officers and jailers	33-3012	Line item	418.5	388.5	0.3	0.2	-30	-7.2	34
Detectives and criminal investigators	33-3021	Line item	112.5	115.3	0.1	0.1	2.8	2.5	8.4
Fish and game wardens	33-3031	Line item	7.5	7.5	0	0	0	0.2	0.8
Parking enforcement workers	33-3041	Line item	7.9	5.1	0	0	-2.8	-35	0.4
Police officers	33-3050	Summary	674.9	723.8	0.4	0.4	48.9	7.2	57.9
Police and sheriff's patrol officers	33-3051	Line item	671.2	719.8	0.4	0.4	48.6	7.2	57.6
Transit and railroad police	33-3052	Line item	3.8	4.1	0	0	0.3	8.6	0.3
Other protective service workers	33-9000	Summary	1509.7	1727.1	1	1	217.4	14.4	267.7
Animal control workers	33-9011	Line item	11.8	13	0	0	1.2	10.5	1.2
Private detectives and investigators	33-9021	Line item	33.7	38.1	0	0	4.4	13.2	3.5
Security guards and gambling surveillance officers	33-9030	Summary	1067.7	1223.3	0.7	0.7	155.6	14.6	165
Gambling surveillance officers and gambling investigators	33-9031	Line item	8.7	10.1	0	0	1.4	15.5	1.4
Security guards	33-9032	Line item	1059	1213.2	0.7	0.7	154.2	14.6	163.6
Miscellaneous protective service workers	33-9090	Summary	396.5	452.6	0.3	0.3	56.1	14.2	98.1
Crossing guards and flaggers	33-9091	Line item	85.5	97	0.1	0.1	11.5	13.4	19.1
Lifeguards, ski patrol, and other recreational protective service workers	33-9092	Line item	117.5	146.3	0.1	0.1	28.7	24.5	35.7
Transportation security screeners	33-9093	Line item	51.8	51.9	0	0	0.1	0.2	4.5
School bus monitors and protective service workers, all other	33-9098	Line item	141.6	157.4	0.1	0.1	15.8	11.2	38.8
Food preparation and serving related occupations	35-0000	Summary	11553.3	13820.8	7.5	8.4	2267.6	19.6	2475.3
Supervisors of food preparation and serving workers	35-1000	Summary	1026.1	1244.8	0.7	0.8	218.8	21.3	185.9
Chefs and head cooks	35-1011	Line item	110.7	138.7	0.1	0.1	28	25.3	18.8
First-line supervisors of food preparation and serving workers	35-1012	Line item	915.4	1106.1	0.6	0.7	190.8	20.8	167.2
Cooks and food preparation workers	35-2000	Summary	3102.7	3749.9	2	2.3	647.2	20.9	581.7
Cooks	35-2010	Summary	2281.4	2876.1	1.5	1.7	594.6	26.1	432
Cooks, fast food	35-2011	Line item	547.8	536.2	0.4	0.3	-11.6	-2.1	77.1
Cooks, institution and cafeteria	35-2012	Line item	394.6	421.5	0.3	0.3	27	6.8	61.6
Cooks, private household	35-2013	Line item	40.9	41.8	0	0	0.9	2.1	6.1
Cooks, restaurant	35-2014	Line item	1153.2	1716.7	0.8	1	563.5	48.9	263.6
Cooks, short order	35-2015	Line item	124.5	136.4	0.1	0.1	11.9	9.6	20
Cooks, all other	35-2019	Line item	20.5	23.3	0	0	2.9	14	3.5
Food preparation workers	35-2021	Line item	821.2	873.8	0.5	0.5	52.6	6.4	149.8
Food and beverage serving workers	35-3000	Summary	6222.3	7342	4.1	4.4	1119.7	18	1431.7
Bartenders	35-3011	Line item	492.3	652.3	0.3	0.4	159.9	32.5	111.3
Fast food and counter workers	35-3023	Line item	3455.5	3973	2.3	2.4	517.5	15	804.6
Waiters and waitresses	35-3031	Line item	2023.2	2430.7	1.3	1.5	407.6	20.1	470.2
Food servers, nonrestaurant	35-3041	Line item	251.3	286	0.2	0.2	34.7	13.8	45.7
Other food preparation and serving related workers	35-9000	Summary	1202.2	1484	0.8	0.9	281.8	23.4	275.9
Dining room and cafeteria attendants and bartender helpers	35-9011	Line item	389	492.5	0.3	0.3	103.6	26.6	86.5
Dishwashers	35-9021	Line item	408.5	486.3	0.3	0.3	77.8	19	78.8
Hosts and hostesses, restaurant, lounge, and coffee shop	35-9031	Line item	333.6	417.8	0.2	0.3	84.2	25.3	95.2
Food preparation and serving related workers, all other	35-9099	Line item	71.2	87.4	0	0.1	16.2	22.8	15.3
Building and grounds cleaning and maintenance occupations	37-0000	Summary	5168.8	5555.6	3.4	3.4	386.8	7.5	733.8
Supervisors of building and grounds cleaning and maintenance workers	37-1000	Summary	406.9	427.4	0.3	0.3	20.5	5.1	47.1
First-line supervisors of housekeeping and janitorial workers	37-1011	Line item	225.5	238.8	0.1	0.1	13.2	5.9	27.3
First-line supervisors of landscaping, lawn service, and groundskeeping workers	37-1012	Line item	181.3	188.6	0.1	0.1	7.3	4	19.7
Building cleaning and pest control workers	37-2000	Summary	3535	3808.7	2.3	2.3	273.7	7.7	513.5
Building cleaning workers	37-2010	Summary	3448.2	3713.6	2.2	2.2	265.4	7.7	500.7
Janitors and cleaners, except maids and housekeeping cleaners	37-2011	Line item	2217	2344.2	1.4	1.4	127.2	5.7	314.9
Maids and housekeeping cleaners	37-2012	Line item	1212.8	1350.3	0.8	0.8	137.5	11.3	183.3
Building cleaning workers, all other	37-2019	Line item	18.4	19.1	0	0	0.7	3.5	2.6
Pest control workers	37-2021	Line item	86.8	95	0.1	0.1	8.2	9.5	12.8
Grounds maintenance workers	37-3000	Summary	1226.9	1319.5	0.8	0.8	92.6	7.6	173.2
Landscaping and groundskeeping workers	37-3011	Line item	1117.8	1202.8	0.7	0.7	85	7.6	157.9
Pesticide handlers, sprayers, and applicators, vegetation	37-3012	Line item	27.3	29.6	0	0	2.3	8.3	3.9
Tree trimmers and pruners	37-3013	Line item	66.4	70.5	0	0	4.1	6.1	9.2
Grounds maintenance workers, all other	37-3019	Line item	15.3	16.6	0	0	1.3	8.6	2.2
Personal care and service occupations	39-0000	Summary	3870.4	4711.4	2.5	2.8	841	21.7	685
Supervisors of personal care and service workers	39-1000	Summary	222.4	275.5	0.1	0.2	53.1	23.9	31.7
First-line supervisors of gambling services workers	39-1013	Line item	22	26.7	0	0	4.7	21.4	3
First-line supervisors of personal service and entertainment and recreation workers, except gambling services	39-1098	Line item	200.4	248.8	0.1	0.2	48.4	24.2	28.6
Animal care and service workers	39-2000	Summary	332.7	443.4	0.2	0.3	110.8	33.3	66.2
Animal trainers	39-2011	Line item	60.2	77.4	0	0	17.2	28.5	9.9
Animal caretakers	39-2021	Line item	272.4	366.1	0.2	0.2	93.6	34.4	56.4
Entertainment attendants and related workers	39-3000	Summary	460.2	626.6	0.3	0.4	166.5	36.2	125.9
Gambling services workers	39-3010	Summary	91.3	113.8	0.1	0.1	22.6	24.7	17.1
Gambling dealers	39-3011	Line item	74.1	91.9	0	0.1	17.8	24	13.8
Gambling and sports book writers and runners	39-3012	Line item	8	10.3	0	0	2.3	28.5	1.5
Gambling service workers, all other	39-3019	Line item	9.2	11.7	0	0	2.5	27.2	1.8
Motion picture projectionists	39-3021	Line item	1.7	2.9	0	0	1.2	70.5	0.6
Ushers, lobby attendants, and ticket takers	39-3031	Line item	81.5	131.9	0.1	0.1	50.4	61.8	29.4
Miscellaneous entertainment attendants and related workers	39-3090	Summary	285.7	378	0.2	0.2	92.3	32.3	78.8
Amusement and recreation attendants	39-3091	Line item	264.4	349.8	0.2	0.2	85.4	32.3	72.9
Costume attendants	39-3092	Line item	5.4	7.7	0	0	2.4	44.3	1.6
Locker room, coatroom, and dressing room attendants	39-3093	Line item	12	15.2	0	0	3.2	26.3	3.2
Entertainment attendants and related workers, all other	39-3099	Line item	3.9	5.3	0	0	1.4	35.4	1.1
Embalmers	39-4011	Line item	5	5	0	0	0	-0.6	0.7
Funeral attendants	39-4021	Line item	42.3	43.7	0	0	1.4	3.3	5.8
Morticians, undertakers, and funeral arrangers	39-4031	Line item	25	26.1	0	0	1	4.1	3.1
Personal appearance workers	39-5000	Summary	828.3	1012.2	0.5	0.6	184	22.2	116.4
Barbers, hairdressers, hairstylists and cosmetologists	39-5010	Summary	622.7	742.4	0.4	0.4	119.8	19.2	85.3
Barbers	39-5011	Line item	53	62.3	0	0	9.3	17.5	6.4
Hairdressers, hairstylists, and cosmetologists	39-5012	Line item	569.6	680.1	0.4	0.4	110.5	19.4	78.9
Miscellaneous personal appearance workers	39-5090	Summary	205.6	269.8	0.1	0.2	64.2	31.2	31.1
Makeup artists, theatrical and performance	39-5091	Line item	3.1	4.2	0	0	1.1	37	0.5
Manicurists and pedicurists	39-5092	Line item	123	163.1	0.1	0.1	40.1	32.6	18.8
Shampooers	39-5093	Line item	10.8	14.1	0	0	3.2	29.8	1.6
Skincare specialists	39-5094	Line item	68.7	88.4	0	0.1	19.8	28.8	10.1
Baggage porters, bellhops, and concierges	39-6000	Summary	65.6	80	0	0	14.4	22	10.8
Baggage porters and bellhops	39-6011	Line item	28.6	35.6	0	0	7	24.5	4.8
Concierges	39-6012	Line item	37.1	44.5	0	0	7.4	20	6
Tour and travel guides	39-7000	Summary	44	56.8	0	0	12.8	29.1	9.2
Tour and travel guides	39-7010	Line item	44	56.8	0	0	12.8	29.1	9.2
Childcare workers	39-9011	Line item	992.4	1076.6	0.6	0.7	84.2	8.5	150.3
Recreation and fitness workers	39-9030	Summary	663.9	843.3	0.4	0.5	179.5	27	133.6
Exercise trainers and group fitness instructors	39-9031	Line item	309.8	431.4	0.2	0.3	121.7	39.3	69.1
Recreation workers	39-9032	Line item	354.1	411.9	0.2	0.2	57.8	16.3	64.6
Residential advisors	39-9041	Line item	108.2	121.6	0.1	0.1	13.4	12.4	17.5
Crematory operators and personal care and service workers, all other	39-9098	Line item	80.5	100.5	0.1	0.1	19.9	24.8	13.9
Sales and related occupations	41-0000	Summary	14393.6	14190.7	9.4	8.6	-202.9	-1.4	1838.6
Supervisors of sales workers	41-1000	Summary	1767	1658	1.2	1	-109	-6.2	162.3
First-line supervisors of retail sales workers	41-1011	Line item	1390.6	1300.4	0.9	0.8	-90.2	-6.5	131.8
First-line supervisors of non-retail sales workers	41-1012	Line item	376.4	357.6	0.2	0.2	-18.8	-5	30.6
Retail sales workers	41-2000	Summary	7858.8	7527.6	5.1	4.6	-331.2	-4.2	1154.1
Cashiers	41-2010	Summary	3393.8	3060	2.2	1.8	-333.8	-9.8	550.1
Cashiers	41-2011	Line item	3379.1	3042.7	2.2	1.8	-336.4	-10	546.9
Gambling change persons and booth cashiers	41-2012	Line item	14.7	17.3	0	0	2.7	18.1	3.2
Counter and rental clerks and parts salespersons	41-2020	Summary	629.9	671.9	0.4	0.4	42	6.7	79.4
Counter and rental clerks	41-2021	Line item	372.1	401.5	0.2	0.2	29.4	7.9	46.8
Parts salespersons	41-2022	Line item	257.8	270.4	0.2	0.2	12.6	4.9	32.6
Retail salespersons	41-2031	Line item	3835	3795.7	2.5	2.3	-39.3	-1	524.5
Sales representatives, services	41-3000	Summary	2134.3	2293.2	1.4	1.4	158.9	7.4	241.7
Advertising sales agents	41-3011	Line item	115.1	118.7	0.1	0.1	3.6	3.1	14.8
Insurance sales agents	41-3021	Line item	507.2	542.7	0.3	0.3	35.5	7	50.4
Securities, commodities, and financial services sales agents	41-3031	Line item	466.3	485.8	0.3	0.3	19.5	4.2	42.5
Travel agents	41-3041	Line item	60.5	63.8	0	0	3.3	5.4	7.5
Sales representatives of services, except advertising, insurance, financial services, and travel	41-3091	Line item	985.2	1082.1	0.6	0.7	97	9.8	126.5
Sales representatives, wholesale and manufacturing	41-4000	Summary	1625.7	1703.3	1.1	1	77.6	4.8	169.4
Sales representatives, wholesale and manufacturing, technical and scientific products	41-4011	Line item	298.2	316.5	0.2	0.2	18.2	6.1	31.7
Sales representatives, wholesale and manufacturing, except technical and scientific products	41-4012	Line item	1327.5	1386.8	0.9	0.8	59.4	4.5	137.8
Other sales and related workers	41-9000	Summary	1007.9	1008.6	0.7	0.6	0.8	0.1	111
Models, demonstrators, and product promoters	41-9010	Summary	78.9	84.8	0.1	0.1	5.9	7.5	15.1
Demonstrators and product promoters	41-9011	Line item	76.3	81.9	0	0	5.6	7.3	14.6
Models	41-9012	Line item	2.7	3	0	0	0.3	11.4	0.5
Real estate brokers and sales agents	41-9020	Summary	518.8	540.6	0.3	0.3	21.8	4.2	47.5
Real estate brokers	41-9021	Line item	109.9	114.8	0.1	0.1	4.9	4.5	10.1
Real estate sales agents	41-9022	Line item	408.9	425.8	0.3	0.3	16.9	4.1	37.4
Sales engineers	41-9031	Line item	63.8	68.8	0	0	5	7.9	7.3
Telemarketers	41-9041	Line item	119.7	97.8	0.1	0.1	-21.9	-18.3	13.9
Miscellaneous sales and related workers	41-9090	Summary	226.6	216.5	0.1	0.1	-10.1	-4.5	27.2
Door-to-door sales workers, news and street vendors, and related workers	41-9091	Line item	54	41	0	0	-13	-24.1	4.7
Sales and related workers, all other	41-9099	Line item	172.6	175.5	0.1	0.1	2.9	1.7	22.5
Office and administrative support occupations	43-0000	Summary	19554.7	19015.6	12.7	11.5	-539.2	-2.8	2062.8
Supervisors of office and administrative support workers	43-1000	Summary	1487.3	1464.4	1	0.9	-22.9	-1.5	142.7
First-line supervisors of office and administrative support workers	43-1011	Line item	1487.3	1464.4	1	0.9	-22.9	-1.5	142.7
Communications equipment operators	43-2000	Summary	69.1	54.8	0	0	-14.2	-20.6	5.4
Switchboard operators, including answering service	43-2011	Line item	59.9	46.3	0	0	-13.6	-22.7	4.5
Telephone operators	43-2021	Line item	4.8	3.6	0	0	-1.2	-25.4	0.4
Communications equipment operators, all other	43-2099	Line item	4.4	5	0	0	0.6	13.8	0.5
Financial clerks	43-3000	Summary	2977.7	2832.8	1.9	1.7	-144.9	-4.9	295.5
Bill and account collectors	43-3011	Line item	223.1	202.6	0.1	0.1	-20.5	-9.2	20.8
Billing and posting clerks	43-3021	Line item	458.5	471.6	0.3	0.3	13.1	2.9	48.9
Bookkeeping, accounting, and auditing clerks	43-3031	Line item	1620	1571.9	1.1	1	-48.1	-3	170.2
Gambling cage workers	43-3041	Line item	11.3	13.5	0	0	2.2	19.5	1.5
Payroll and timekeeping clerks	43-3051	Line item	137.3	119.7	0.1	0.1	-17.7	-12.9	11.4
Procurement clerks	43-3061	Line item	63	59.8	0	0	-3.2	-5.1	5.2
Tellers	43-3071	Line item	432.5	359.4	0.3	0.2	-73.1	-16.9	33.7
Financial clerks, all other	43-3099	Line item	31.9	34.3	0	0	2.4	7.5	3.7
Information and record clerks	43-4000	Summary	5676.1	5687	3.7	3.4	10.9	0.2	693.2
Brokerage clerks	43-4011	Line item	45.5	41.1	0	0	-4.4	-9.8	4.2
Correspondence clerks	43-4021	Line item	7	6.8	0	0	-0.2	-2.9	0.7
Court, municipal, and license clerks	43-4031	Line item	162.1	171.6	0.1	0.1	9.5	5.8	17.5
Credit authorizers, checkers, and clerks	43-4041	Line item	25.3	24.1	0	0	-1.2	-4.8	2.3
Customer service representatives	43-4051	Line item	2923.4	2888.8	1.9	1.7	-34.5	-1.2	361.7
Eligibility interviewers, government programs	43-4061	Line item	145.4	150.9	0.1	0.1	5.6	3.8	13.7
File clerks	43-4071	Line item	99.7	87.1	0.1	0.1	-12.6	-12.6	9.6
Hotel, motel, and resort desk clerks	43-4081	Line item	221	257.3	0.1	0.2	36.3	16.4	42.8
Interviewers, except eligibility and loan	43-4111	Line item	180.2	168.4	0.1	0.1	-11.8	-6.5	20.1
Library assistants, clerical	43-4121	Line item	88	87.5	0.1	0.1	-0.5	-0.6	13.4
Loan interviewers and clerks	43-4131	Line item	208.8	203.8	0.1	0.1	-5	-2.4	17.6
New accounts clerks	43-4141	Line item	46.1	38.4	0	0	-7.7	-16.7	3.2
Order clerks	43-4151	Line item	133.9	109.5	0.1	0.1	-24.4	-18.2	10.4
Human resources assistants, except payroll and timekeeping	43-4161	Line item	112	108.8	0.1	0.1	-3.2	-2.9	10.6
Receptionists and information clerks	43-4171	Line item	1016.2	1060	0.7	0.6	43.8	4.3	134
Reservation and transportation ticket agents and travel clerks	43-4181	Line item	101.6	114.7	0.1	0.1	13.1	12.9	13.1
Information and record clerks, all other	43-4199	Line item	159.9	168.1	0.1	0.1	8.2	5.1	18.3
Material recording, scheduling, dispatching, and distributing workers	43-5000	Summary	2213	2174.9	1.4	1.3	-38	-1.7	196.3
Cargo and freight agents	43-5011	Line item	95.6	105.1	0.1	0.1	9.5	9.9	10.7
Couriers and messengers	43-5021	Line item	142.2	130.5	0.1	0.1	-11.7	-8.2	11.8
Dispatchers	43-5030	Summary	287.5	303.6	0.2	0.2	16.1	5.6	28.6
Public safety telecommunicators	43-5031	Line item	95.4	103.2	0.1	0.1	7.8	8.2	9.8
Dispatchers, except police, fire, and ambulance	43-5032	Line item	192.1	200.4	0.1	0.1	8.3	4.3	18.7
Meter readers, utilities	43-5041	Line item	27	24.7	0	0	-2.3	-8.6	1.7
Postal service workers	43-5050	Summary	500.9	457.6	0.3	0.3	-43.3	-8.6	31.9
Postal service clerks	43-5051	Line item	82.8	76.4	0.1	0	-6.4	-7.8	5.8
Postal service mail carriers	43-5052	Line item	317.7	293.1	0.2	0.2	-24.7	-7.8	19.1
Postal service mail sorters, processors, and processing machine operators	43-5053	Line item	100.4	88.2	0.1	0.1	-12.2	-12.2	7
Production, planning, and expediting clerks	43-5061	Line item	365.7	393.6	0.2	0.2	27.9	7.6	41
Shipping, receiving, and inventory clerks	43-5071	Line item	734.9	694.3	0.5	0.4	-40.6	-5.5	64
Weighers, measurers, checkers, and samplers, recordkeeping	43-5111	Line item	59.1	65.4	0	0	6.3	10.7	6.5
Secretaries and administrative assistants	43-6000	Summary	3363.9	3137.7	2.2	1.9	-226.2	-6.7	324.3
Executive secretaries and executive administrative assistants	43-6011	Line item	538.8	438.2	0.4	0.3	-100.6	-18.7	42.1
Legal secretaries and administrative assistants	43-6012	Line item	160.4	126.7	0.1	0.1	-33.6	-21	12
Medical secretaries and administrative assistants	43-6013	Line item	611.2	676.1	0.4	0.4	64.9	10.6	75.2
Secretaries and administrative assistants, except legal, medical, and executive	43-6014	Line item	2053.5	1896.7	1.3	1.1	-156.9	-7.6	195.1
Other office and administrative support workers	43-9000	Summary	3767.7	3664	2.5	2.2	-103.8	-2.8	405.6
Data entry and information processing workers	43-9020	Summary	203.7	151.8	0.1	0.1	-51.9	-25.5	14.2
Data entry keyers	43-9021	Line item	158.4	122.8	0.1	0.1	-35.6	-22.5	11.6
Word processors and typists	43-9022	Line item	45.2	28.9	0	0	-16.3	-36	2.6
Desktop publishers	43-9031	Line item	8.2	7.2	0	0	-1	-12.3	0.8
Insurance claims and policy processing clerks	43-9041	Line item	277.9	281.8	0.2	0.2	3.9	1.4	26.7
Mail clerks and mail machine operators, except postal service	43-9051	Line item	82.2	78.7	0.1	0	-3.4	-4.2	8.8
Office clerks, general	43-9061	Line item	2933.9	2873.6	1.9	1.7	-60.4	-2.1	324.6
Office machine operators, except computer	43-9071	Line item	41.7	36.1	0	0	-5.6	-13.5	3.8
Proofreaders and copy markers	43-9081	Line item	7.9	8.3	0	0	0.4	5.3	1.1
Statistical assistants	43-9111	Line item	10.4	11.3	0	0	0.8	7.9	1.3
Office and administrative support workers, all other	43-9199	Line item	201.9	215.3	0.1	0.1	13.4	6.6	24.4
Farming, fishing, and forestry occupations	45-0000	Summary	1061.8	1088.4	0.7	0.7	26.6	2.5	169.2
Supervisors of farming, fishing, and forestry workers	45-1000	Summary	53.2	57.8	0	0	4.6	8.7	8.3
First-line supervisors of farming, fishing, and forestry workers	45-1011	Line item	53.2	57.8	0	0	4.6	8.7	8.3
Agricultural workers	45-2000	Summary	918.1	934.6	0.6	0.6	16.5	1.8	146.5
Agricultural inspectors	45-2011	Line item	16.6	18.2	0	0	1.5	9.1	2.9
Animal breeders	45-2021	Line item	8.4	8.2	0	0	-0.3	-3.2	1.3
Graders and sorters, agricultural products	45-2041	Line item	32.5	32.1	0	0	-0.5	-1.4	4.7
Miscellaneous agricultural workers	45-2090	Summary	860.5	876.2	0.6	0.5	15.7	1.8	137.6
Agricultural equipment operators	45-2091	Line item	65	73.4	0	0	8.4	12.9	11.7
Farmworkers and laborers, crop, nursery, and greenhouse	45-2092	Line item	526.3	554.3	0.3	0.3	28	5.3	87.4
Farmworkers, farm, ranch, and aquacultural animals	45-2093	Line item	256.9	235.5	0.2	0.1	-21.3	-8.3	36.4
Agricultural workers, all other	45-2099	Line item	12.3	12.9	0	0	0.6	4.9	2
Fishing and hunting workers	45-3000	Summary	32.3	35.8	0	0	3.4	10.6	5.3
Fishing and hunting workers	45-3031	Line item	32.3	35.8	0	0	3.4	10.6	5.3
Forest, conservation, and logging workers	45-4000	Summary	58.1	60.2	0	0	2.1	3.5	9.1
Forest and conservation workers	45-4011	Line item	12.6	11.6	0	0	-1	-8	1.8
Logging workers	45-4020	Summary	45.5	48.6	0	0	3.1	6.7	7.4
Fallers	45-4021	Line item	5.6	5.5	0	0	-0.1	-1.3	0.8
Logging equipment operators	45-4022	Line item	30.9	33.5	0	0	2.5	8.1	5.1
Log graders and scalers	45-4023	Line item	4	4.3	0	0	0.3	7.7	0.7
Logging workers, all other	45-4029	Line item	5	5.3	0	0	0.3	6.3	0.8
Construction and extraction occupations	47-0000	Summary	6971.1	7371.2	4.5	4.5	400	5.7	741.4
Supervisors of construction and extraction workers	47-1000	Summary	692.2	735.3	0.5	0.4	43.1	6.2	70.7
First-line supervisors of construction trades and extraction workers	47-1011	Line item	692.2	735.3	0.5	0.4	43.1	6.2	70.7
Construction trades workers	47-2000	Summary	5364.5	5658.5	3.5	3.4	294	5.5	558.1
Boilermakers	47-2011	Line item	14.9	14.7	0	0	-0.2	-1	1.3
Brickmasons, blockmasons, and stonemasons	47-2020	Summary	83.5	79.6	0.1	0	-3.9	-4.6	7.2
Brickmasons and blockmasons	47-2021	Line item	69.6	65.9	0	0	-3.7	-5.3	6
Stonemasons	47-2022	Line item	13.9	13.7	0	0	-0.2	-1.4	1.3
Carpenters	47-2031	Line item	942.9	963	0.6	0.6	20.1	2.1	89.3
Carpet, floor, and tile installers and finishers	47-2040	Summary	117.6	125.1	0.1	0.1	7.5	6.4	11
Carpet installers	47-2041	Line item	32.6	30.7	0	0	-1.9	-5.9	2.5
Floor layers, except carpet, wood, and hard tiles	47-2042	Line item	23.7	26.6	0	0	2.9	12.3	2.4
Floor sanders and finishers	47-2043	Line item	7.2	7.5	0	0	0.3	4.5	0.7
Tile and stone setters	47-2044	Line item	54.1	60.3	0	0	6.2	11.5	5.4
Cement masons, concrete finishers, and terrazzo workers	47-2050	Summary	197.1	195	0.1	0.1	-2.1	-1.1	17.4
Cement masons and concrete finishers	47-2051	Line item	194.1	192.2	0.1	0.1	-1.9	-1	17.2
Terrazzo workers and finishers	47-2053	Line item	3	2.7	0	0	-0.3	-8.5	0.2
Construction laborers	47-2061	Line item	1285.2	1388.3	0.8	0.8	103.2	8	140.1
Construction equipment operators	47-2070	Summary	457.2	482.1	0.3	0.3	24.9	5.4	51.5
Paving, surfacing, and tamping equipment operators	47-2071	Line item	44.8	47.4	0	0	2.5	5.6	5.1
Pile driver operators	47-2072	Line item	3.9	4.1	0	0	0.2	4.8	0.4
Operating engineers and other construction equipment operators	47-2073	Line item	408.5	430.7	0.3	0.3	22.2	5.4	46
Drywall installers, ceiling tile installers, and tapers	47-2080	Summary	141	147.1	0.1	0.1	6.1	4.3	12.3
Drywall and ceiling tile installers	47-2081	Line item	121.2	127.2	0.1	0.1	6	4.9	10.7
Tapers	47-2082	Line item	19.8	19.9	0	0	0.1	0.5	1.6
Electricians	47-2111	Line item	729.6	795.7	0.5	0.5	66.1	9.1	84.7
Glaziers	47-2121	Line item	53.6	56.1	0	0	2.5	4.7	6
Insulation workers	47-2130	Summary	61.5	64.6	0	0	3.1	5	6.1
Insulation workers, floor, ceiling, and wall	47-2131	Line item	33.3	34.9	0	0	1.6	4.9	3.3
Insulation workers, mechanical	47-2132	Line item	28.2	29.6	0	0	1.4	5.1	2.8
Painters and paperhangers	47-2140	Summary	355.4	374.1	0.2	0.2	18.6	5.2	33.1
Painters, construction and maintenance	47-2141	Line item	350.8	369.1	0.2	0.2	18.3	5.2	32.7
Paperhangers	47-2142	Line item	4.6	4.9	0	0	0.3	6.4	0.4
Pipelayers, plumbers, pipefitters, and steamfitters	47-2150	Summary	504.9	527.8	0.3	0.3	22.8	4.5	54.5
Pipelayers	47-2151	Line item	35.1	34.5	0	0	-0.5	-1.5	3.5
Plumbers, pipefitters, and steamfitters	47-2152	Line item	469.9	493.2	0.3	0.3	23.4	5	51
Plasterers and stucco masons	47-2161	Line item	26.1	27.8	0	0	1.8	6.8	2.4
Reinforcing iron and rebar workers	47-2171	Line item	22.1	23.2	0	0	1.2	5.3	2.2
Roofers	47-2181	Line item	153.7	160.8	0.1	0.1	7.1	4.6	15.6
Sheet metal workers	47-2211	Line item	135.4	140.2	0.1	0.1	4.8	3.6	13.1
Structural iron and steel workers	47-2221	Line item	71	75.3	0	0	4.2	5.9	7.9
Solar photovoltaic installers	47-2231	Line item	11.8	17.9	0	0	6.1	52.1	2.3
Helpers, construction trades	47-3000	Summary	229.1	235	0.1	0.1	5.9	2.6	27.7
Helpers--brickmasons, blockmasons, stonemasons, and tile and marble setters	47-3011	Line item	20.9	20.1	0	0	-0.8	-3.9	2.3
Helpers--carpenters	47-3012	Line item	31	31.2	0	0	0.2	0.7	3.7
Helpers--electricians	47-3013	Line item	75.5	76.2	0	0	0.7	0.9	8.9
Helpers--painters, paperhangers, plasterers, and stucco masons	47-3014	Line item	9.4	10	0	0	0.6	6.8	1.2
Helpers--pipelayers, plumbers, pipefitters, and steamfitters	47-3015	Line item	56.2	59.4	0	0	3.1	5.6	7.1
Helpers--roofers	47-3016	Line item	8.2	8.6	0	0	0.4	4.8	1
Helpers, construction trades, all other	47-3019	Line item	27.8	29.5	0	0	1.7	5.9	3.5
Other construction and related workers	47-4000	Summary	459.5	478.4	0.3	0.3	19	4.1	52.4
Construction and building inspectors	47-4011	Line item	129.3	125.6	0.1	0.1	-3.8	-2.9	14.3
Elevator and escalator installers and repairers	47-4021	Line item	24.8	26.3	0	0	1.5	6.1	2.5
Fence erectors	47-4031	Line item	28	29.2	0	0	1.2	4.3	3
Hazardous materials removal workers	47-4041	Line item	44.5	47.4	0	0	2.9	6.6	5.8
Highway maintenance workers	47-4051	Line item	153.8	163.1	0.1	0.1	9.3	6	17.1
Rail-track laying and maintenance equipment operators	47-4061	Line item	15.7	16.5	0	0	0.8	5.3	1.5
Septic tank servicers and sewer pipe cleaners	47-4071	Line item	30.4	34.8	0	0	4.4	14.3	4.2
Miscellaneous construction and related workers	47-4090	Line item	32.9	35.6	0	0	2.7	8.1	4.2
Extraction workers	47-5000	Summary	225.9	264	0.1	0.2	38.1	16.9	32.5
Derrick, rotary drill, and service unit operators, oil and gas	47-5010	Summary	67.3	83.8	0	0.1	16.5	24.6	10.5
Derrick operators, oil and gas	47-5011	Line item	9	11.7	0	0	2.7	29.7	1.5
Rotary drill operators, oil and gas	47-5012	Line item	15.2	19.2	0	0	4	26.4	2.4
Service unit operators, oil and gas	47-5013	Line item	43.1	52.9	0	0	9.8	22.9	6.6
Excavating and loading machine and dragline operators, surface mining	47-5022	Line item	41.3	43.1	0	0	1.8	4.5	5.1
Continuous mining machine operators	47-5041	Line item	15.2	16.1	0	0	0.9	5.7	1.9
Roof bolters, mining	47-5043	Line item	2.1	1.9	0	0	-0.1	-6.9	0.2
Loading and moving machine operators, underground mining	47-5044	Line item	3.5	3.3	0	0	-0.2	-5.5	0.4
Rock splitters, quarry	47-5051	Line item	4.6	4.9	0	0	0.3	6	0.6
Roustabouts, oil and gas	47-5071	Line item	43.5	56.4	0	0	12.9	29.5	7.2
Helpers--extraction workers	47-5081	Line item	12.6	15.5	0	0	2.9	23	1.9
Earth drillers, except oil and gas; and explosives workers, ordnance handling experts, and blasters	47-5097	Line item	23.2	25.1	0	0	1.8	8	3
Underground mining machine operators and extraction workers, all other	47-5098	Line item	12.6	13.9	0	0	1.3	10.2	1.7
Installation, maintenance, and repair occupations	49-0000	Summary	5847.3	6239.8	3.8	3.8	392.5	6.7	612.7
Supervisors of installation, maintenance, and repair workers	49-1000	Summary	484.1	515.8	0.3	0.3	31.7	6.6	47.4
First-line supervisors of mechanics, installers, and repairers	49-1011	Line item	484.1	515.8	0.3	0.3	31.7	6.6	47.4
Electrical and electronic equipment mechanics, installers, and repairers	49-2000	Summary	552.8	564.1	0.4	0.3	11.2	2	57.1
Computer, automated teller, and office machine repairers	49-2011	Line item	102.4	100.2	0.1	0.1	-2.2	-2.2	10.5
Radio and telecommunications equipment installers and repairers	49-2020	Summary	209.3	207.6	0.1	0.1	-1.7	-0.8	23.1
Radio, cellular, and tower equipment installers and repairers	49-2021	Line item	13.5	14.1	0	0	0.5	3.9	1.6
Telecommunications equipment installers and repairers, except line installers	49-2022	Line item	195.8	193.5	0.1	0.1	-2.2	-1.1	21.5
Miscellaneous electrical and electronic equipment mechanics, installers, and repairers	49-2090	Summary	241.1	256.3	0.2	0.2	15.2	6.3	23.5
Avionics technicians	49-2091	Line item	21.2	23.2	0	0	2.1	9.7	1.7
Electric motor, power tool, and related repairers	49-2092	Line item	17.8	19.1	0	0	1.2	6.9	1.9
Electrical and electronics installers and repairers, transportation equipment	49-2093	Line item	9.1	9.7	0	0	0.6	6.7	0.8
Electrical and electronics repairers, commercial and industrial equipment	49-2094	Line item	56.4	59	0	0	2.5	4.5	4.7
Electrical and electronics repairers, powerhouse, substation, and relay	49-2095	Line item	23.1	22.5	0	0	-0.5	-2.4	1.7
Electronic equipment installers and repairers, motor vehicles	49-2096	Line item	10.2	8.5	0	0	-1.6	-16.2	0.6
Audiovisual equipment installers and repairers	49-2097	Line item	29.9	28.8	0	0	-1.1	-3.8	3
Security and fire alarm systems installers	49-2098	Line item	73.4	85.5	0	0.1	12.1	16.4	9.2
Vehicle and mobile equipment mechanics, installers, and repairers	49-3000	Summary	1702.8	1787.1	1.1	1.1	84.3	5	176.5
Aircraft mechanics and service technicians	49-3011	Line item	130.1	145.4	0.1	0.1	15.3	11.8	12.7
Automotive technicians and repairers	49-3020	Summary	877.3	889.2	0.6	0.5	11.9	1.4	86.5
Automotive body and related repairers	49-3021	Line item	153.7	161.8	0.1	0.1	8.1	5.3	15.2
Automotive glass installers and repairers	49-3022	Line item	19.7	21.5	0	0	1.7	8.8	2.3
Automotive service technicians and mechanics	49-3023	Line item	703.8	705.9	0.5	0.4	2.1	0.3	69
Bus and truck mechanics and diesel engine specialists	49-3031	Line item	275.4	296.8	0.2	0.2	21.4	7.8	28.1
Heavy vehicle and mobile equipment service technicians and mechanics	49-3040	Summary	220.8	245	0.1	0.1	24.3	11	25.1
Farm equipment mechanics and service technicians	49-3041	Line item	47.6	52.9	0	0	5.3	11.1	5.4
Mobile heavy equipment mechanics, except engines	49-3042	Line item	152.1	169.9	0.1	0.1	17.8	11.7	17.5
Rail car repairers	49-3043	Line item	21.1	22.2	0	0	1.1	5.2	2.2
Small engine mechanics	49-3050	Summary	69	75.4	0	0	6.5	9.4	8.6
Motorboat mechanics and service technicians	49-3051	Line item	21.7	24.6	0	0	2.9	13.3	2.8
Motorcycle mechanics	49-3052	Line item	14	15.4	0	0	1.4	9.6	1.7
Outdoor power equipment and other small engine mechanics	49-3053	Line item	33.3	35.5	0	0	2.2	6.7	4
Miscellaneous vehicle and mobile equipment mechanics, installers, and repairers	49-3090	Summary	130.2	135.2	0.1	0.1	5	3.8	15.6
Bicycle repairers	49-3091	Line item	12.1	12.5	0	0	0.4	3.7	1.4
Recreational vehicle service technicians	49-3092	Line item	15.4	18.1	0	0	2.7	17.2	2.2
Tire repairers and changers	49-3093	Line item	102.7	104.6	0.1	0.1	1.9	1.8	12
Other installation, maintenance, and repair occupations	49-9000	Summary	3107.6	3372.8	2	2	265.2	8.5	331.6
Control and valve installers and repairers	49-9010	Summary	73.5	77.4	0	0	3.9	5.3	6.4
Mechanical door repairers	49-9011	Line item	22.8	25.5	0	0	2.8	12.2	2.2
Control and valve installers and repairers, except mechanical door	49-9012	Line item	50.8	51.9	0	0	1.1	2.3	4.2
Heating, air conditioning, and refrigeration mechanics and installers	49-9021	Line item	380.4	399.4	0.2	0.2	19	5	38.5
Home appliance repairers	49-9031	Line item	31.6	30.4	0	0	-1.1	-3.6	2.9
Industrial machinery installation, repair, and maintenance workers	49-9040	Summary	502.3	597.3	0.3	0.4	95.1	18.9	56.4
Industrial machinery mechanics	49-9041	Line item	391.8	475.3	0.3	0.3	83.6	21.3	45.1
Maintenance workers, machinery	49-9043	Line item	65.6	72.6	0	0	7	10.7	6.8
Millwrights	49-9044	Line item	44.2	48.7	0	0	4.6	10.3	4.4
Refractory materials repairers, except brickmasons	49-9045	Line item	0.8	0.6	0	0	-0.1	-14.5	0
Line installers and repairers	49-9050	Summary	240.3	241	0.2	0.1	0.7	0.3	23.3
Electrical power-line installers and repairers	49-9051	Line item	115.9	117.4	0.1	0.1	1.5	1.3	10.2
Telecommunications line installers and repairers	49-9052	Line item	124.4	123.6	0.1	0.1	-0.8	-0.7	13.1
Precision instrument and equipment repairers	49-9060	Summary	80.5	84.4	0.1	0.1	3.9	4.8	8.9
Camera and photographic equipment repairers	49-9061	Line item	3.7	4	0	0	0.3	8	0.4
Medical equipment repairers	49-9062	Line item	54.9	58.8	0	0	3.9	7.2	6.3
Musical instrument repairers and tuners	49-9063	Line item	7.8	7.5	0	0	-0.3	-3.9	0.8
Watch and clock repairers	49-9064	Line item	2.8	2.1	0	0	-0.7	-24.9	0.2
Precision instrument and equipment repairers, all other	49-9069	Line item	11.4	12	0	0	0.6	5.6	1.3
Maintenance and repair workers, general	49-9071	Line item	1444.1	1561.1	0.9	0.9	117	8.1	152.3
Wind turbine service technicians	49-9081	Line item	6.9	11.7	0	0	4.7	68.2	1.4
Miscellaneous installation, maintenance, and repair workers	49-9090	Summary	348	370.1	0.2	0.2	22.1	6.3	41.5
Coin, vending, and amusement machine servicers and repairers	49-9091	Line item	27.2	29.7	0	0	2.4	9	3.6
Commercial divers	49-9092	Line item	4	4.7	0	0	0.7	16.8	0.5
Locksmiths and safe repairers	49-9094	Line item	19.2	18.8	0	0	-0.5	-2.3	1.8
Manufactured building and mobile home installers	49-9095	Line item	3.4	2.8	0	0	-0.6	-18.4	0.3
Riggers	49-9096	Line item	21.3	23.9	0	0	2.6	12.1	2.5
Signal and track switch repairers	49-9097	Line item	6.6	7	0	0	0.4	5.6	0.7
Helpers--installation, maintenance, and repair workers	49-9098	Line item	92.9	99.8	0.1	0.1	6.9	7.4	12.9
Installation, maintenance, and repair workers, all other	49-9099	Line item	173.2	183.4	0.1	0.1	10.2	5.9	19.2
Production occupations	51-0000	Summary	8766.5	8727.4	5.7	5.3	-39	-0.4	949.7
Supervisors of production workers	51-1000	Summary	616.8	639.6	0.4	0.4	22.7	3.7	63.4
First-line supervisors of production and operating workers	51-1011	Line item	616.8	639.6	0.4	0.4	22.7	3.7	63.4
Assemblers and fabricators	51-2000	Summary	1731.7	1645.7	1.1	1	-86	-5	174.2
Aircraft structure, surfaces, rigging, and systems assemblers	51-2011	Line item	37.8	31.7	0	0	-6	-15.9	3.2
Electrical, electronics, and electromechanical assemblers	51-2020	Summary	297.3	315.3	0.2	0.2	18	6.1	33.7
Coil winders, tapers, and finishers	51-2021	Line item	12.4	10.9	0	0	-1.5	-12.4	1.1
Electrical, electronic, and electromechanical assemblers, except coil winders, tapers, and finishers	51-2028	Line item	284.8	304.4	0.2	0.2	19.5	6.9	32.7
Engine and other machine assemblers	51-2031	Line item	43.7	38.5	0	0	-5.1	-11.8	4
Structural metal fabricators and fitters	51-2041	Line item	70	62	0	0	-8	-11.4	5.9
Fiberglass laminators and fabricators	51-2051	Line item	19.2	19.1	0	0	-0.1	-0.4	2.1
Timing device assemblers and adjusters	51-2061	Line item	1	0.8	0	0	-0.2	-17.8	0.1
Miscellaneous assemblers and fabricators	51-2090	Line item	1262.8	1178.2	0.8	0.7	-84.6	-6.7	125.2
Food processing workers	51-3000	Summary	821.1	853.1	0.5	0.5	31.9	3.9	104.4
Bakers	51-3011	Line item	193.4	211.7	0.1	0.1	18.4	9.5	28.3
Butchers and other meat, poultry, and fish processing workers	51-3020	Summary	377.6	378.3	0.2	0.2	0.7	0.2	43.5
Butchers and meat cutters	51-3021	Line item	145	137.2	0.1	0.1	-7.8	-5.4	15.4
Meat, poultry, and fish cutters and trimmers	51-3022	Line item	153	158	0.1	0.1	5	3.3	18.4
Slaughterers and meat packers	51-3023	Line item	79.7	83.1	0.1	0.1	3.4	4.3	9.7
Miscellaneous food processing workers	51-3090	Summary	250.1	263	0.2	0.2	12.9	5.1	32.6
Food and tobacco roasting, baking, and drying machine operators and tenders	51-3091	Line item	19	19.9	0	0	0.8	4.4	2.3
Food batchmakers	51-3092	Line item	159.3	168.3	0.1	0.1	8.9	5.6	20.7
Food cooking machine operators and tenders	51-3093	Line item	26.8	28.2	0	0	1.4	5.1	4.8
Food processing workers, all other	51-3099	Line item	45	46.7	0	0	1.7	3.8	4.8
Metal workers and plastic workers	51-4000	Summary	1728.9	1770.4	1.1	1.1	41.4	2.4	182.6
Forming machine setters, operators, and tenders, metal and plastic	51-4020	Summary	118.8	109.6	0.1	0.1	-9.2	-7.7	10.1
Extruding and drawing machine setters, operators, and tenders, metal and plastic	51-4021	Line item	70.5	65.2	0	0	-5.3	-7.5	6
Forging machine setters, operators, and tenders, metal and plastic	51-4022	Line item	13.7	11.9	0	0	-1.8	-13.2	1.1
Rolling machine setters, operators, and tenders, metal and plastic	51-4023	Line item	34.5	32.4	0	0	-2.1	-6.1	3
Machine tool cutting setters, operators, and tenders, metal and plastic	51-4030	Summary	299.9	288.3	0.2	0.2	-11.6	-3.9	29.3
Cutting, punching, and press machine setters, operators, and tenders, metal and plastic	51-4031	Line item	182	177.5	0.1	0.1	-4.5	-2.4	17.6
Drilling and boring machine tool setters, operators, and tenders, metal and plastic	51-4032	Line item	9.1	7.7	0	0	-1.4	-15.5	0.7
Grinding, lapping, polishing, and buffing machine tool setters, operators, and tenders, metal and plastic	51-4033	Line item	69.4	67.1	0	0	-2.3	-3.3	7.5
Lathe and turning machine tool setters, operators, and tenders, metal and plastic	51-4034	Line item	23.7	22.7	0	0	-1	-4.4	2.2
Milling and planing machine setters, operators, and tenders, metal and plastic	51-4035	Line item	15.7	13.3	0	0	-2.4	-15.1	1.2
Machinists	51-4041	Line item	363	391.8	0.2	0.2	28.8	7.9	41.2
Metal furnace operators, tenders, pourers, and casters	51-4050	Summary	22.2	22.2	0	0	0	0.1	2
Metal-refining furnace operators and tenders	51-4051	Line item	15.1	15.5	0	0	0.4	2.6	1.4
Pourers and casters, metal	51-4052	Line item	7.1	6.7	0	0	-0.4	-5.1	0.6
Model makers and patternmakers, metal and plastic	51-4060	Summary	5.8	5.6	0	0	-0.2	-4.2	0.5
Model makers, metal and plastic	51-4061	Line item	3.4	3.3	0	0	-0.2	-4.9	0.3
Patternmakers, metal and plastic	51-4062	Line item	2.4	2.3	0	0	-0.1	-3.2	0.2
Molders and molding machine setters, operators, and tenders, metal and plastic	51-4070	Summary	173.5	163.4	0.1	0.1	-10.1	-5.8	15.9
Foundry mold and coremakers	51-4071	Line item	15.8	15.3	0	0	-0.5	-3.3	1.5
Molding, coremaking, and casting machine setters, operators, and tenders, metal and plastic	51-4072	Line item	157.7	148.2	0.1	0.1	-9.6	-6.1	14.4
Multiple machine tool setters, operators, and tenders, metal and plastic	51-4081	Line item	138.4	150.2	0.1	0.1	11.8	8.6	15.6
Tool and die makers	51-4111	Line item	62.3	63.3	0	0	0.9	1.5	6.4
Welding, soldering, and brazing workers	51-4120	Summary	453.3	487.1	0.3	0.3	33.8	7.5	52.8
Welders, cutters, solderers, and brazers	51-4121	Line item	418.2	452.4	0.3	0.3	34.1	8.2	49.2
Welding, soldering, and brazing machine setters, operators, and tenders	51-4122	Line item	35.1	34.7	0	0	-0.3	-1	3.6
Miscellaneous metal workers and plastic workers	51-4190	Summary	91.7	88.9	0.1	0.1	-2.8	-3.1	8.8
Heat treating equipment setters, operators, and tenders, metal and plastic	51-4191	Line item	16.9	16.2	0	0	-0.7	-4	1.6
Layout workers, metal and plastic	51-4192	Line item	7.9	7.3	0	0	-0.5	-6.6	0.7
Plating machine setters, operators, and tenders, metal and plastic	51-4193	Line item	39.3	38.2	0	0	-1.1	-2.7	3.8
Tool grinders, filers, and sharpeners	51-4194	Line item	6.2	6.1	0	0	-0.1	-2.4	0.6
Metal workers and plastic workers, all other	51-4199	Line item	21.4	21	0	0	-0.4	-2	2.1
Printing workers	51-5100	Summary	230.7	202.6	0.2	0.1	-28	-12.2	21.2
Prepress technicians and workers	51-5111	Line item	28.2	23.3	0	0	-4.8	-17.1	3
Printing press operators	51-5112	Line item	160.9	144.9	0.1	0.1	-15.9	-9.9	14.7
Print binding and finishing workers	51-5113	Line item	41.6	34.4	0	0	-7.3	-17.5	3.5
Textile, apparel, and furnishings workers	51-6000	Summary	537.7	521.1	0.4	0.3	-16.5	-3.1	61.9
Laundry and dry-cleaning workers	51-6011	Line item	175.5	196.1	0.1	0.1	20.6	11.8	26.6
Pressers, textile, garment, and related materials	51-6021	Line item	30.3	27	0	0	-3.3	-10.8	2.6
Sewing machine operators	51-6031	Line item	133.5	114.8	0.1	0.1	-18.6	-14	12.2
Shoe and leather workers	51-6040	Summary	13.6	11.3	0	0	-2.3	-16.8	1.2
Shoe and leather workers and repairers	51-6041	Line item	8.7	7.5	0	0	-1.2	-14	0.8
Shoe machine operators and tenders	51-6042	Line item	5	3.9	0	0	-1.1	-21.6	0.4
Tailors, dressmakers, and sewers	51-6050	Summary	48.8	45.1	0	0	-3.8	-7.7	5.7
Sewers, hand	51-6051	Line item	6.9	6.2	0	0	-0.7	-9.5	0.8
Tailors, dressmakers, and custom sewers	51-6052	Line item	42	38.9	0	0	-3.1	-7.4	4.9
Textile machine setters, operators, and tenders	51-6060	Summary	66.4	58	0	0	-8.4	-12.7	6.5
Textile bleaching and dyeing machine operators and tenders	51-6061	Line item	7.5	6.5	0	0	-1	-13.8	0.7
Textile cutting machine setters, operators, and tenders	51-6062	Line item	12.9	11.5	0	0	-1.4	-11.1	1.3
Textile knitting and weaving machine setters, operators, and tenders	51-6063	Line item	19.6	16.7	0	0	-2.9	-14.8	1.9
Textile winding, twisting, and drawing out machine setters, operators, and tenders	51-6064	Line item	26.4	23.4	0	0	-3	-11.5	2.6
Miscellaneous textile, apparel, and furnishings workers	51-6090	Summary	69.6	68.8	0	0	-0.8	-1.1	7
Extruding and forming machine setters, operators, and tenders, synthetic and glass fibers	51-6091	Line item	16.2	15.5	0	0	-0.7	-4.3	1.8
Fabric and apparel patternmakers	51-6092	Line item	4.7	4.2	0	0	-0.5	-9.7	0.5
Upholsterers	51-6093	Line item	32.1	33.5	0	0	1.4	4.5	3
Textile, apparel, and furnishings workers, all other	51-6099	Line item	16.7	15.6	0	0	-1.1	-6.4	1.8
Woodworkers	51-7000	Summary	257.8	281.2	0.2	0.2	23.4	9.1	29.9
Cabinetmakers and bench carpenters	51-7011	Line item	103.9	113.1	0.1	0.1	9.1	8.8	11
Furniture finishers	51-7021	Line item	18.1	19.1	0	0	1	5.8	2.6
Model makers and patternmakers, wood	51-7030	Summary	1.2	1.6	0	0	0.4	35.8	0.2
Model makers, wood	51-7031	Line item	1	1.3	0	0	0.4	38.6	0.1
Patternmakers, wood	51-7032	Line item	0.2	0.3	0	0	0.1	24.7	0
Woodworking machine setters, operators, and tenders	51-7040	Summary	125	135.8	0.1	0.1	10.7	8.6	14.9
Sawing machine setters, operators, and tenders, wood	51-7041	Line item	50.5	53.9	0	0	3.4	6.7	6.2
Woodworking machine setters, operators, and tenders, except sawing	51-7042	Line item	74.6	81.9	0	0	7.3	9.8	8.7
Woodworkers, all other	51-7099	Line item	9.5	11.6	0	0	2.1	22.2	1.2
Plant and system operators	51-8000	Summary	301.9	295.9	0.2	0.2	-6	-2	28.5
Power plant operators, distributors, and dispatchers	51-8010	Summary	49	41.9	0	0	-7.1	-14.4	3.5
Nuclear power reactor operators	51-8011	Line item	5.3	3.6	0	0	-1.8	-32.9	0.2
Power distributors and dispatchers	51-8012	Line item	10	9.3	0	0	-0.7	-7.3	0.8
Power plant operators	51-8013	Line item	33.6	29	0	0	-4.6	-13.6	2.5
Stationary engineers and boiler operators	51-8021	Line item	30.7	32.5	0	0	1.8	5.8	4
Water and wastewater treatment plant and system operators	51-8031	Line item	122.1	119	0.1	0.1	-3.1	-2.5	10.5
Miscellaneous plant and system operators	51-8090	Summary	100.1	102.4	0.1	0.1	2.3	2.3	10.5
Chemical plant and system operators	51-8091	Line item	29.5	29.4	0	0	-0.1	-0.5	3
Gas plant operators	51-8092	Line item	15.1	14.8	0	0	-0.3	-1.8	1.5
Petroleum pump system operators, refinery operators, and gaugers	51-8093	Line item	40.6	42.8	0	0	2.3	5.6	4.4
Plant and system operators, all other	51-8099	Line item	14.9	15.4	0	0	0.5	3.1	1.6
Other production occupations	51-9000	Summary	2539.9	2517.9	1.7	1.5	-22	-0.9	283.6
Chemical processing machine setters, operators, and tenders	51-9010	Summary	143.1	140.7	0.1	0.1	-2.4	-1.7	13.9
Chemical equipment operators and tenders	51-9011	Line item	93.5	88.6	0.1	0.1	-4.9	-5.3	8.6
Separating, filtering, clarifying, precipitating, and still machine setters, operators, and tenders	51-9012	Line item	49.6	52.1	0	0	2.5	5	5.3
Crushing, grinding, polishing, mixing, and blending workers	51-9020	Summary	174.4	175.6	0.1	0.1	1.3	0.7	19.1
Crushing, grinding, and polishing machine setters, operators, and tenders	51-9021	Line item	32.6	32.5	0	0	-0.1	-0.4	3.5
Grinding and polishing workers, hand	51-9022	Line item	23.7	20.5	0	0	-3.2	-13.6	2.1
Mixing and blending machine setters, operators, and tenders	51-9023	Line item	118.1	122.7	0.1	0.1	4.6	3.9	13.5
Cutting workers	51-9030	Summary	61.6	57.4	0	0	-4.2	-6.9	6.8
Cutters and trimmers, hand	51-9031	Line item	8.1	5.7	0	0	-2.4	-29.7	0.6
Cutting and slicing machine setters, operators, and tenders	51-9032	Line item	53.6	51.7	0	0	-1.9	-3.5	6.2
Extruding, forming, pressing, and compacting machine setters, operators, and tenders	51-9041	Line item	65.6	66.3	0	0	0.8	1.2	6.7
Furnace, kiln, oven, drier, and kettle operators and tenders	51-9051	Line item	17.8	18.7	0	0	0.9	4.9	1.8
Inspectors, testers, sorters, samplers, and weighers	51-9061	Line item	557.9	489.8	0.4	0.3	-68.1	-12.2	54.9
Jewelers and precious stone and metal workers	51-9071	Line item	32.4	32.1	0	0	-0.3	-0.8	3.8
Dental and ophthalmic laboratory technicians and medical appliance technicians	51-9080	Summary	75.2	84.4	0	0.1	9.2	12.3	11
Dental laboratory technicians	51-9081	Line item	33.1	37.2	0	0	4	12.2	4.9
Medical appliance technicians	51-9082	Line item	14.6	16.7	0	0	2.1	14.4	2.2
Ophthalmic laboratory technicians	51-9083	Line item	27.5	30.6	0	0	3.1	11.2	4
Packaging and filling machine operators and tenders	51-9111	Line item	371.8	392	0.2	0.2	20.2	5.4	43.1
Painting workers	51-9120	Summary	155.8	167.3	0.1	0.1	11.6	7.4	17.2
Painting, coating, and decorating workers	51-9123	Line item	12.4	13.2	0	0	0.8	6.3	1.3
Coating, painting, and spraying machine setters, operators, and tenders	51-9124	Line item	143.4	154.2	0.1	0.1	10.8	7.5	15.9
Semiconductor processing technicians	51-9141	Line item	33.2	32.6	0	0	-0.6	-1.7	3.5
Photographic process workers and processing machine operators	51-9151	Line item	9.3	8.5	0	0	-0.8	-8.7	1.3
Computer numerically controlled tool operators and programmers	51-9160	Summary	185.5	189	0.1	0.1	3.5	1.9	20.6
Computer numerically controlled tool operators	51-9161	Line item	158.4	154.5	0.1	0.1	-3.9	-2.5	16.5
Computer numerically controlled tool programmers	51-9162	Line item	27.1	34.5	0	0	7.4	27.4	4.1
Miscellaneous production workers	51-9190	Summary	656.4	663.4	0.4	0.4	7.1	1.1	79.8
Adhesive bonding machine operators and tenders	51-9191	Line item	12.5	12.6	0	0	0.1	0.9	1.5
Cleaning, washing, and metal pickling equipment operators and tenders	51-9192	Line item	14.7	15.7	0	0	0.9	6.3	1.7
Cooling and freezing equipment operators and tenders	51-9193	Line item	8.4	8.9	0	0	0.5	6	1
Etchers and engravers	51-9194	Line item	9.9	10.1	0	0	0.2	2.4	1.3
Molders, shapers, and casters, except metal and plastic	51-9195	Line item	46.3	53.3	0	0	7	15.1	5.7
Paper goods machine setters, operators, and tenders	51-9196	Line item	102.3	94.9	0.1	0.1	-7.4	-7.3	10.2
Tire builders	51-9197	Line item	20.6	20.5	0	0	-0.2	-0.8	2
Helpers--production workers	51-9198	Line item	238	227.2	0.2	0.1	-10.8	-4.5	31.8
Production workers, all other	51-9199	Line item	203.6	220.3	0.1	0.1	16.7	8.2	24.6
Transportation and material moving occupations	53-0000	Summary	12673.2	13793.3	8.3	8.3	1120.1	8.8	1770.7
Supervisors of transportation and material moving workers	53-1000	Summary	547.1	579.3	0.4	0.4	32.3	5.9	62.8
Aircraft cargo handling supervisors	53-1041	Line item	11	12.3	0	0	1.3	11.9	1.4
First-line supervisors of transportation and material-moving workers, except aircraft cargo handling supervisors	53-1047	Line item	536.1	567	0.3	0.3	30.9	5.8	61.5
Air transportation workers	53-2000	Summary	251.3	299.4	0.2	0.2	48.1	19.1	35.7
Aircraft pilots and flight engineers	53-2010	Summary	113.9	128.6	0.1	0.1	14.7	12.9	14.5
Airline pilots, copilots, and flight engineers	53-2011	Line item	74.7	85	0	0.1	10.3	13.7	9.6
Commercial pilots	53-2012	Line item	39.2	43.6	0	0	4.5	11.4	4.9
Air traffic controllers and airfield operations specialists	53-2020	Summary	34.9	37.2	0	0	2.3	6.5	3.7
Air traffic controllers	53-2021	Line item	24.5	25.5	0	0	0.9	3.8	2.5
Airfield operations specialists	53-2022	Line item	10.4	11.7	0	0	1.3	12.9	1.2
Flight attendants	53-2031	Line item	102.5	133.6	0.1	0.1	31.1	30.4	17.6
Motor vehicle operators	53-3000	Summary	4391.8	4920.6	2.9	3	528.8	12	569.1
Ambulance drivers and attendants, except emergency medical technicians	53-3011	Line item	14.2	16.5	0	0	2.3	16.3	1.9
Driver/sales workers and truck drivers	53-3030	Summary	3445.5	3750.5	2.2	2.3	305	8.9	421.8
Driver/sales workers	53-3031	Line item	458.2	540	0.3	0.3	81.9	17.9	62.5
Heavy and tractor-trailer truck drivers	53-3032	Line item	1951.6	2073.6	1.3	1.3	122.1	6.3	231.1
Light truck drivers	53-3033	Line item	1035.8	1136.8	0.7	0.7	101.1	9.8	128.3
Passenger vehicle drivers	53-3050	Summary	872.6	1087.9	0.6	0.7	215.3	24.7	134.8
Bus drivers, transit and intercity	53-3052	Line item	165.2	200	0.1	0.1	34.8	21	24.6
Passenger vehicle drivers, except bus drivers, transit and intercity	53-3058	Line item	707.4	887.9	0.5	0.5	180.6	25.5	110.2
Motor vehicle operators, all other	53-3099	Line item	59.6	65.7	0	0	6.2	10.3	10.6
Rail transportation workers	53-4000	Summary	87.3	92	0.1	0.1	4.7	5.4	8.3
Locomotive engineers and operators	53-4010	Summary	30.7	32.2	0	0	1.5	4.9	2.9
Locomotive engineers	53-4011	Line item	26.5	27.9	0	0	1.5	5.6	2.5
Rail yard engineers, dinkey operators, and hostlers	53-4013	Line item	4.2	4.3	0	0	0	0.8	0.4
Railroad brake, signal, and switch operators and locomotive firers	53-4022	Line item	11	11.3	0	0	0.2	2	1
Railroad conductors and yardmasters	53-4031	Line item	32.9	34.7	0	0	1.8	5.5	3.1
Subway and streetcar operators	53-4041	Line item	11	12.1	0	0	1.1	10.2	1.1
Rail transportation workers, all other	53-4099	Line item	1.7	1.7	0	0	0	2.6	0.2
Water transportation workers	53-5000	Summary	66.6	74.4	0	0	7.8	11.7	8.4
Sailors and marine oilers	53-5011	Line item	26.4	29.2	0	0	2.7	10.4	3.5
Ship and boat captains and operators	53-5020	Summary	32.5	36.9	0	0	4.4	13.6	3.9
Captains, mates, and pilots of water vessels	53-5021	Line item	29.9	33.9	0	0	4	13.5	3.6
Motorboat operators	53-5022	Line item	2.6	3	0	0	0.4	14.7	0.3
Ship engineers	53-5031	Line item	7.8	8.4	0	0	0.6	8.2	1
Other transportation workers	53-6000	Summary	334.6	367.7	0.2	0.2	33.1	9.9	52.3
Bridge and lock tenders	53-6011	Line item	3.2	3.3	0	0	0.1	2.8	0.4
Parking attendants	53-6021	Line item	123.8	141.3	0.1	0.1	17.5	14.2	21.9
Automotive and watercraft service attendants	53-6031	Line item	115.7	120.7	0.1	0.1	5	4.3	16.4
Traffic technicians	53-6041	Line item	7.6	8.2	0	0	0.6	7.8	1.1
Transportation inspectors	53-6051	Line item	29	30.3	0	0	1.3	4.6	3.3
Passenger attendants	53-6061	Line item	23.2	27.2	0	0	4.1	17.5	4
Aircraft service attendants and transportation workers, all other	53-6098	Line item	32.1	36.7	0	0	4.5	14.1	5.1
Material moving workers	53-7000	Summary	6994.6	7459.9	4.6	4.5	465.3	6.7	1034.1
Conveyor operators and tenders	53-7011	Line item	27.3	29	0	0	1.7	6.1	3.5
Crane and tower operators	53-7021	Line item	44.8	47.2	0	0	2.4	5.4	5
Dredge operators	53-7031	Line item	2	2.1	0	0	0.1	5.2	0.3
Hoist and winch operators	53-7041	Line item	5	5.2	0	0	0.2	3.4	0.6
Industrial truck and tractor operators	53-7051	Line item	631.6	680.3	0.4	0.4	48.7	7.7	75
Laborers and material movers	53-7060	Summary	6074.4	6464.3	4	3.9	389.8	6.4	919.7
Cleaners of vehicles and equipment	53-7061	Line item	367.2	399.6	0.2	0.2	32.4	8.8	56.1
Laborers and freight, stock, and material movers, hand	53-7062	Line item	2821.7	3077.5	1.8	1.9	255.8	9.1	411.3
Machine feeders and offbearers	53-7063	Line item	63	66.9	0	0	3.9	6.3	8.8
Packers and packagers, hand	53-7064	Line item	599.7	600.6	0.4	0.4	1	0.2	82.9
Stockers and order fillers	53-7065	Line item	2223	2319.7	1.4	1.4	96.7	4.4	360.5
Pumping station operators	53-7070	Summary	28.8	31.4	0	0	2.6	9.1	3.5
Gas compressor and gas pumping station operators	53-7071	Line item	4.1	4	0	0	-0.1	-1.4	0.4
Pump operators, except wellhead pumpers	53-7072	Line item	11.1	12.5	0	0	1.4	12.6	1.4
Wellhead pumpers	53-7073	Line item	13.6	14.8	0	0	1.3	9.4	1.7
Refuse and recyclable material collectors	53-7081	Line item	140.5	157.2	0.1	0.1	16.7	11.9	21.4
Tank car, truck, and ship loaders	53-7121	Line item	13	13.6	0	0	0.6	4.7	1.6
Material moving workers, all other	53-7199	Line item	27.1	29.6	0	0	2.5	9.1	3.6
